1 **Atg39 links and deforms the outer and inner nuclear membranes in selective**  
2 **autophagy of the nucleus**

3

4 Keisuke Mochida<sup>1,2</sup>, Toshifumi Otani<sup>1</sup>, Yuto Katsumata<sup>1</sup>, Hiromi Kirisako<sup>1</sup>, Chika Kakuta<sup>1</sup>,  
5 Tetsuya Kotani<sup>1</sup>, Hitoshi Nakatogawa<sup>1,\*</sup>

6

7 <sup>1</sup>School of Life Science and Technology, Tokyo Institute of Technology, Yokohama, Japan

8 \*Correspondence to Hitoshi Nakatogawa: [hnakatogawa@bio.titech.ac.jp](mailto:hakatogawa@bio.titech.ac.jp)

9

10 <sup>2</sup>Present address: Laboratory for Protein Conformation Diseases, RIKEN Center for Brain  
11 Science, Wako, Japan

12

13

14 Condensed title: Atg39 deforms the nuclear envelope in nucleophagy

15

16

17 **Abstract**

18 In selective autophagy of the nucleus (hereafter nucleophagy), nucleus-derived double membrane  
19 vesicles (NDVs) are formed, sequestered within autophagosomes, and delivered to lysosomes or  
20 vacuoles for degradation. In *Saccharomyces cerevisiae*, the nuclear envelope (NE) protein Atg39  
21 acts as a nucleophagy receptor, which interacts with Atg8 to target NDVs to forming  
22 autophagosomal membranes. In this study, we revealed that Atg39 is anchored to the outer nuclear  
23 membrane (ONM) via its transmembrane domain and also associated with the inner nuclear  
24 membrane (INM) via membrane-binding amphipathic helices (APHs) in its perinuclear space  
25 region, thereby linking these membranes. We also revealed that overaccumulation of Atg39  
26 causes the NE to protrude towards the cytoplasm, and the tips of the protrusions are pinched off  
27 to generate NDVs. The APHs of Atg39 are crucial for Atg39 assembly in the NE and subsequent  
28 NE protrusion. These findings suggest that the nucleophagy receptor Atg39 plays pivotal roles in  
29 NE deformation during the generation of NDVs to be degraded by nucleophagy.

## 30 **Introduction**

31 Macroautophagy (hereafter autophagy) is the mechanism whereby cellular material such as  
32 proteins and RNA as well as larger structures such as protein aggregates, phase-separated liquid  
33 droplets, and membrane-bound organelles are degraded, playing an important role in the  
34 maintenance and regulation of various cellular functions (Nakatogawa, 2020; Morishita and  
35 Mizushima, 2019). Autophagy initiates with the formation and expansion of the membrane  
36 cisterna known as the isolation membrane or phagophore, which bends, becomes spherical, and  
37 seals to sequester degradation targets within the resulting double membrane vesicle, the  
38 autophagosome. The autophagosome then fuses with the lysosome in animals and the vacuole in  
39 yeast and plants for degradation of the sequestered material within these lytic organelles.  
40 Sequestration of cellular components into autophagosomes proceeds in both a selective and non-  
41 selective manner. In selective types of autophagy (hereafter selective autophagy), autophagy  
42 receptors bind to degradation targets and act to recruit core Atg proteins, which mediate  
43 autophagosome biogenesis, to the targets for their efficient sequestration into the autophagosomes  
44 (Morishita and Mizushima, 2019; Farré and Subramani, 2016). Previous studies suggest that  
45 different organelles, including mitochondria, peroxisomes, the endoplasmic reticulum (ER), and  
46 the nucleus, are degraded by selective autophagy, and autophagy receptors responsible for  
47 degradation of these organelles have also been identified (Morishita and Mizushima, 2019; Farré  
48 and Subramani, 2016).

49         The nucleus contains chromosomes, and the double membraned nuclear envelope (NE)  
50 separates specific reactions such as DNA replication and gene transcription from the cytoplasm.  
51 The outer nuclear membrane (ONM) and the perinuclear space (NE lumen) are continuous with  
52 the membrane and the lumen of the ER, respectively, and therefore, these membranes and spaces  
53 share many proteins. The ubiquitin-proteasome system is vital in preventing the accumulation of

54 aberrant proteins in the nucleus. However, nuclear inclusion bodies are formed when these  
55 proteins accumulate beyond the capacity of the system in neurodegenerative diseases such as  
56 Huntington's disease (Enam et al., 2018; Woulfe, 2008). Recent studies suggest that nuclear  
57 components are delivered to and degraded in lysosomes or vacuoles via autophagy (Mijaljica and  
58 Devenish, 2013; Mochida et al., 2015). In the budding yeast *Saccharomyces cerevisiae*, we  
59 identified the transmembrane protein Atg39 as a receptor for selective autophagy of the nucleus  
60 (hereafter nucleophagy) (Mochida et al., 2015). Meanwhile, yeast cells lacking Atg39 exhibited  
61 abnormal nuclear morphology and an early cell death phenotype under nitrogen starvation. We  
62 and other groups also reported selective autophagy of nuclear pore complexes and nuclear lamina  
63 in yeast and mammalian cells, respectively (Dou et al., 2015; Tomioka et al., 2020; Lee et al.,  
64 2020). These results therefore suggest that selective degradation of nuclear components via  
65 autophagy also has a significant impact on nuclear homeostasis in cells.

66         We previously revealed that when *S. cerevisiae* cells are subjected to nitrogen starvation  
67 or treated with the Tor kinase complex 1 (TORC1) inhibitor rapamycin, Atg39 is expressed and  
68 localized to the NE, and, as with other autophagy receptors (Farré and Subramani, 2016), it  
69 interacts with Atg11, which serves as a scaffold to recruit core Atg proteins, and Atg8, which is  
70 located on expanding isolation membranes, loading nucleus-derived double membrane vesicles  
71 (NDVs) of ~200 nm into the autophagosomes (Mochida et al., 2015). The outer and inner  
72 membranes of NDVs are derived from the ONM and inner nuclear membrane (INM), respectively,  
73 with nucleoplasmic and nucleolar proteins existing in the vesicle lumen. To generate NDVs, the  
74 ONM and INM need to induce deformation and fission in a coordinated manner. Because NDVs  
75 do not accumulate in the cytoplasm of cells deficient for autophagosome formation, these vesicles  
76 are thought to form concomitantly with autophagosome formation. We also found that Atg39  
77 accumulates in the NE at contact with the site of autophagosome formation; however, the



78 mechanisms underlying these processes of NDV formation during nucleophagy remain unknown.

79 In this study, we discovered that Atg39 binds to both the ONM and INM via its N-  
80 terminal transmembrane domain and C-terminal amphipathic helices (APHs), respectively,  
81 thereby linking these membranes. We also found that overexpression of Atg39 drives the  
82 formation of protrusions from the NE accompanied by both the ONM and INM. The APHs in the  
83 C-terminal perinuclear space region of Atg39 play multiple roles in nucleophagy: Atg39 retention  
84 to the NE; the basal and enhanced assembly of Atg39 in the NE, the latter of which occurs in  
85 conjunction with autophagosome formation; and the formation of NE protrusions, the tips of  
86 which are pinched off to generate NDVs.

87

## 88 **Results**

### 89 **Atg39 is an ONM protein**

90 Although Atg39 was predicted to be an integral membrane protein with a single transmembrane  
91 domain, separating it into N-terminal (1–144) and C-terminal (165–398) regions, its membrane  
92 topology has yet to be demonstrated experimentally. To determine the membrane topology of  
93 Atg39, lysates were prepared from yeast cells expressing Atg39 N- and C-terminally tagged with  
94 HA and GFP sequences, respectively, were treated with proteinase K in the presence or absence  
95 of the detergent Triton X-100 (TX-100) (Fig. 1A and B). Immunoblotting using anti-HA antibody  
96 showed that the HA tag in HA-Atg39-GFP was digested by proteinase K regardless of the  
97 presence of TX-100 (Fig. 1A). In contrast, immunoblotting with anti-GFP antibody revealed that  
98 the GFP tag in Atg39-GFP was largely resistant to proteinase K in the absence of TX-100,  
99 although it was trimmed to a size corresponding to the protein lacking the region N-terminal to  
100 the transmembrane domain (Fig. 1B). These results suggest that Atg39 is a single-pass membrane  
101 protein with N- and C-terminal regions exposed to the cytoplasm and the perinuclear space,

102 respectively (Fig. 1C), consistent with the existence of Atg8- and Atg11-binding sequences in the  
103 N-terminal region (Mochida et al., 2015).

104 To investigate whether Atg39 is embedded in the ONM only or in both the ONM and  
105 INM, we used a split-GFP-based system (Smoyer et al., 2016). In this system, an N-terminal  
106 sequence of GFP containing 10  $\beta$  strands (GFP<sup>1-10</sup>) was attached to the ONM/ER membrane  
107 protein Scs2 (GFP<sup>1-10</sup>-mCherry-Scs2) or the nucleoplasmic protein Pus1 (GFP<sup>1-10</sup>-mCherry-Pus1),  
108 and the remaining C-terminal sequence containing the last  $\beta$  strand of GFP (GFP<sup>11</sup>) was fused to  
109 the N terminus of Atg39 (GFP<sup>11</sup>-Atg39) (Fig. 1D). When the two GFP fragments exist in the same  
110 compartment, they form a functional GFP. GFP fluorescence was observed in the NE of cells  
111 coexpressing GFP<sup>1-10</sup>-mCherry-Scs2 and GFP<sup>11</sup>-Atg39, but not those expressing GFP<sup>1-10</sup>-  
112 mCherry-Pus1 instead of GFP<sup>1-10</sup>-mCherry-Scs2. When GFP<sup>1-10</sup>-mCherry-Pus1 was coexpressed  
113 with GFP<sup>11</sup> fused to the INM protein Heh1 (also known as Src1), GFP fluorescence was observed  
114 in the NE (INM), confirming that GFP<sup>1-10</sup>-mCherry-Pus1 can form a functional GFP if the GFP<sup>11</sup>-  
115 fused protein exists in the same compartment. These results support the conclusion that Atg39  
116 specifically localizes to the ONM.

117

#### 118 **APHs of Atg39 bind to the INM to retain Atg39 in the NE**

119 Because the ONM is continuous with the ER membrane, a mechanism must exist that retains  
120 Atg39 in the ONM. The determined topology of Atg39 suggests that the C-terminal region (165-  
121 398) is exposed to the perinuclear space; however, the importance and function of this region in  
122 nucleophagy have yet to be investigated. We therefore examined the intracellular localization of  
123 C-terminally truncated Atg39 mutants (Fig. 2A, B). Whereas Atg39<sup>1-347</sup> and Atg39<sup>1-325</sup>, as with  
124 wild-type Atg39, exhibited specific localization to the ONM, Atg39<sup>1-296</sup> and Atg39<sup>1-194</sup> leaked out  
125 into the ER, which spreads mainly beneath the plasma membrane in yeast cells (West et al., 2011).

126 In contrast, deletion of the N-terminal cytoplasmic region did not affect the ONM localization of  
127 Atg39 (Fig. S1A). These results suggest that the C-terminal region 297-325 is responsible for  
128 limiting Atg39 localization to the ONM.

129 In analysis of the localization of N-terminally truncated Atg39 mutants, we found that  
130 the mutant lacking cytoplasmic and transmembrane domains (Atg39<sup>167-398</sup>) localized to the surface  
131 of lipid droplets (Fig. S1A, B). Although this is an artifact of cytoplasmic expression of the  
132 perinuclear space region, it raised the possibility that the perinuclear space region of Atg39 has  
133 the ability to associate with lipid membranes. The C-terminal region of Atg39 is predicted to  
134 largely form a helical conformation, containing at least three APHs, including helix 297-324  
135 (APH<sup>297-324</sup>), which is important for the ONM localization of Atg39 (Fig. 2A, B). APHs are known  
136 to bind to membranes through their hydrophobic surface (Drin and Antonny, 2010). We therefore  
137 speculated that APH<sup>297-324</sup> associates with the INM from the side of the perinuclear space to  
138 prevent Atg39 from leaking into the ER. To examine this possibility, nine hydrophobic residues  
139 in APH<sup>297-324</sup> were replaced with alanine (9A) (Fig. 2C). Similar to Atg39<sup>1-296</sup>, this 9A mutant  
140 mislocalized to the ER, highlighting the importance of the amphipathic property of APH<sup>297-324</sup> in  
141 Atg39 retention to the ONM.

142 Next, we performed a co-floitation assay using liposomes and purified APH<sup>297-324</sup> tagged  
143 with GFP-GST (Fig. 2D). Although APH<sup>297-324</sup>-GFP-GST co-floated with small liposomes (~40  
144 nm in diameter) after centrifugation, the 9A mutation severely impaired liposome binding of this  
145 fusion protein, demonstrating that APH<sup>297-324</sup> indeed has a membrane-binding ability. To clarify  
146 that the APHs of Atg39 associate with the INM in the perinuclear space, we performed  
147 immunoelectron microscopy of an Atg39 variant in which the HA sequence was inserted into the  
148 region between APH<sup>297-324</sup> and APH<sup>365-379</sup> (Fig. S1C). Reaction of the immunogold particles with  
149 the HA sequence was frequently detected in the vicinity of the INM. Overall, these findings

150 suggest that, in addition to the transmembrane domain, which penetrates the ONM, Atg39  
151 contains membrane-binding APHs and is exclusively localized to the ONM via the insertion of  
152 APHs into the perinuclear space-facing layer of the INM (Fig. 2E). These two types of membrane-  
153 binding domains bridging the ONM and INM allowed us to speculate that Atg39 couples  
154 deformation of the ONM and INM during NDV formation in nucleophagy.

155

### 156 **APHs of Atg39 promote Atg39 assembly at the NDV formation site**

157 Next, we examined nucleophagy in APH-deleted Atg39 mutants. Nucleophagy activity can be  
158 evaluated by the amounts of protease-resistant GFP fragments (GFP') generated by vacuolar  
159 degradation of the nucleoplasmic protein Tall (Breker et al., 2014) fused with GFP. The results  
160 showed that the Atg39<sup>1-296</sup> and Atg39<sup>1-194</sup> mutants were severely defective in nucleophagy and that  
161 the Atg39<sup>1-347</sup> mutant had a milder defect (Fig. 3A), confirming that the APHs of Atg39 are  
162 important for nucleophagy.

163         Next, we determined which nucleophagy step is defective in Atg39 mutants lacking the  
164 APHs. To this end, we first determined the intracellular dynamics of Atg39 during the process of  
165 nucleophagy. Because the expression of Atg39 is repressed under normal conditions (Mochida et  
166 al., 2015), in these experiments, we expressed Atg39 using the constitutive *HRR25* promoter and  
167 observed changes in Atg39 localization upon rapamycin treatment (nucleophagy induction).  
168 Before adding rapamycin, Atg39-mCherry was almost uniformly distributed in the NE, although  
169 a significant proportion of cells had faint Atg39-mCherry puncta that did not colocalize with the  
170 autophagosomal membrane marker Atg8 tagged with mNeonGreen (mNG) (Fig. 3B). In contrast,  
171 30 min after rapamycin addition, Atg39-mCherry assembled and formed bright puncta that  
172 colocalized with mNG-Atg8, and after 3 h, these puncta disappeared, and mCherry and mNG  
173 fluorescence was observed within the vacuole, showing the progression of nucleophagy (Fig. 3B).

174 Moreover, after 30 min of rapamycin treatment, the NE frequently formed protrusions (or buds),  
175 with notable accumulation of Atg39-mCherry (Fig. 3B). Colocalization of the INM protein Heh1  
176 suggests that the INM protrudes together with the ONM (Fig. 3C). These results further suggest  
177 that NE protrusions associated with bright Atg39-mCherry puncta represent forming NDVs. In  
178 contrast, the bright puncta of Atg39-mCherry did not form in cells lacking the core Atg protein  
179 Atg1 or Atg2, and this was also the case in cells lacking the adapter protein Atg11, which recruits  
180 the core Atg proteins (Fig. S2). Meanwhile, the formation of Atg8-negative, faint Atg39-mCherry  
181 puncta, which did not increase following rapamycin treatment (Fig. 3B), was largely unaffected  
182 by deletion of genes encoding these proteins (Fig. S2). These results suggest that Atg39 partially  
183 assembles in the NE, and that this assembly is strongly enhanced in line with the formation of the  
184 autophagosomal membrane.

185 As with the membrane-binding APHs analyzed previously (Drin and Antonny, 2010),  
186 APH<sup>297-324</sup> of Atg39 preferentially bound to smaller liposomes (membranes with high positive  
187 curvature) (Fig. 2D). Because protruding membrane domains have higher curvature than other  
188 parts of the NE, it is possible that the APHs of Atg39 sense the local curvature in the INM during  
189 assembly. Indeed, deletion of the APHs decreased the formation of both faint (rapamycin-  
190 independent, Atg8-negative) and bright (rapamycin-dependent, Atg8-positive) Atg39-mCherry  
191 puncta (Fig. 3D). These results suggest that the APHs of Atg39 are involved in both basal and  
192 enhanced Atg39 assembly in the NE. As mentioned above, enhanced Atg39 assembly depends on  
193 autophagosome formation (Fig. S2), and thus it is likely that autophagosome formation in the  
194 cytoplasm and APHs bound to the INM act together to assemble Atg39 at the site of NDV  
195 formation.

196

197 **APHs of Atg39 are involved in deformation of the NE during NDV formation**

198 The insertion of APHs into one side of the lipid bilayer can bend the membrane (Drin and Antony,  
199 2010). We therefore examined whether Atg39 itself can induce local NE remodeling for the  
200 generation of NDVs. Atg39-mCherry was overexpressed using the copper-inducible *CUPI*  
201 promoter in *atg1Δ* cells to block nucleophagy and accumulate Atg39-mCherry in the NE. We  
202 found that the accumulation of Atg39 in the NE caused the extension of tubules from the NE (Fig.  
203 4A), consistent with a previous report (Vevea et al., 2015). Rapamycin treatment increased the  
204 formation of these NE tubules in terms of both number and length (Fig. 4A) in *atg1Δ* cells. In  
205 addition, deletion of neither *ATG8* nor *ATG11* affected this tubule formation (Fig. S3A),  
206 suggesting that rapamycin treatment promotes NE tubule formation independent of  
207 autophagosome formation and the interactions of Atg39 with Atg8 and Atg11. Electron  
208 microscopy further confirmed that both the ONM and INM join to form these tubules (Fig. 4B).  
209 The tips of the tubules were often swollen and contained components similar to the nucleoplasm,  
210 consistent with the idea that these structures are related to NDV formation. We also showed that  
211 the formation of NE tubules was much less efficient in cells overexpressing Atg39<sup>1-296</sup> compared  
212 with the wild-type Atg39, suggesting that the APHs of Atg39 are involved in NE tubulation (Fig.  
213 4C). Taken together, these findings suggest that Atg39 has the ability to induce the protrusion of  
214 both the ONM and INM to form NDVs, with the perinuclear-space APHs playing an important  
215 role. Although NE tubulation is an exaggerated phenomenon caused by Atg39 overexpression,  
216 puncta of endogenous Atg39 were often observed at the tip of the NE protrusions (Fig. S3B).  
217 Furthermore, time-lapse microscopy showed that budding and fission of Atg39-mCherry-  
218 enriched structures occur at the tip of NE tubules (Fig. S3C). Overall, these results suggest that  
219 endogenous Atg39 also deforms the NE and generates short protrusions, the tip of which provides  
220 a site for NDV formation.  
221

## 222 **Chromosomes are excluded from NE tubules and NDVs**

223 Lastly, we investigated the incorporation of nuclear components into NE tubules under Atg39  
224 overexpression. Consistent with the electron microscopic observations showing that these tubules  
225 are composed of both the ONM and INM (Fig. 4B), fluorescence microscopy showed signals of  
226 the INM protein Heh1 in most of tubules positive for Atg39 (Fig. 5A). Moreover, although less  
227 but significant proportions of NE tubules also contained the nucleoplasmic protein Tal1 and the  
228 nucleolar protein Nop56, the histone H2A Hta2 seldom colocalized with these tubules. We also  
229 confirmed that histone proteins were absent from NDVs formed using cells lacking Ypt7, a Rab  
230 GTPase essential for autophagosome-vacuole fusion (Kirisako et al., 1999). When these cells  
231 were treated with rapamycin, numerous Atg39-mCherry puncta representing NDVs sequestered  
232 within the autophagosomes accumulated in the cytoplasm (Fig. 5B). Whereas puncta of Tal1-GFP  
233 were observed outside the nucleus, colocalizing with cytoplasmic Atg39-mCherry puncta, the  
234 GFP-fused histones Hta2 and Htz1 did not form any puncta (Fig. 5B). Moreover, Hoechst-stained  
235 DNA was not detected in Atg39-mCherry puncta in these cells (Fig. S4), suggesting that  
236 chromosomes do not enter NE protrusions and are excluded from sequestration into NDVs.

237

## 238 **Discussion**

239 In this study, we showed that the nucleophagy receptor Atg39 is a single membrane-spanning  
240 ONM protein whose N-terminal cytoplasmic region interacts with Atg8 and Atg11 and whose C-  
241 terminal perinuclear space region contains APHs that associate with the INM. Deletion of these  
242 APHs resulted in Atg39 mislocalization to the ER, with impaired basal (autophagosome  
243 formation-independent) and enhanced (autophagosome formation-dependent) assembly in the NE  
244 as well as reduced nucleophagy activity. Overexpression of Atg39 induced the extension of double  
245 membrane tubules from the NE depending on the APHs. Based on these results, we propose the

246 following model for the mechanism of NDV formation during Atg39-mediated nucleophagy (Fig.  
247 6). First, a certain amount of Atg39 assembles in the NE in a manner dependent on its APHs and  
248 independent of autophagosome formation (GFP-Atg8-negative Atg39-mCherry puncta).  
249 Dependency of this basal Atg39 assembly on the APHs suggests that at least the INM protrudes  
250 into the perinuclear space at this stage. The APHs of Atg39 and/or other proteins (see below) may  
251 also be involved in this initial deformation of the NE/INM. The cytoplasmic region of Atg39 in  
252 the assemblage subsequently recruits the core Atg proteins via Atg11, thereby initiating  
253 autophagosome formation on the NE. Atg39 then assembles further, probably via interaction with  
254 Atg11 and the core Atg proteins associated with the isolation membrane such as Atg8, thereby  
255 inducing protrusion of the INM into the perinuclear space through the APHs while remaining  
256 anchored to the ONM in the transmembrane domain, resulting in the formation of double  
257 membrane protrusions out of the NE. Both the ONM and INM cause fission at the tip of the  
258 protrusions, resulting in the formation of NDVs containing intranuclear components, which are  
259 then sequestered into the autophagosomes and delivered to the vacuole for degradation.

260         Although membrane bending via the wedging effect of APH insertion has been well  
261 documented, the findings suggest that the perinuclear space region of Atg39 also generates  
262 membrane curvature through an additional mechanism that can cooperate with the wedging  
263 mechanism. For example, a number of BAR proteins contain APHs and form crescent-shaped  
264 dimers, which serve as scaffolds and act together with the APHs to tubulate membranes  
265 (Baumgart et al., 2011). Steric pressure generated by local crowding of peripheral membrane  
266 proteins can also cause the tubulation of flat membranes (Stachowiak et al., 2012). Structural and  
267 in vitro studies of the perinuclear space region of Atg39 should further clarify the detailed  
268 mechanisms by which this region drives NE deformation. In addition, it is also possible that Atg39  
269 in the cytoplasm and perinuclear space recruits other membrane-deforming proteins to generate



270 NDVs. It should be noted that tubules extending without the INM were also observed in Atg39-  
271 overexpressing cells (Fig. 5A, S3D). These ONM tubules were not formed when Atg39 lacking  
272 the APHs was overexpressed. This observation may be merely an artifact of Atg39 overexpression  
273 but imply that the APHs of Atg39 are also involved in ONM deformation. However, because the  
274 perinuclear space surface of the protruding ONM has negative curvature, the perinuclear space  
275 region other than the APHs might contribute to deformation of the ONM.

276           Although the mechanism of NDV fission from the NE remains unknown, the ESCRT-  
277 III complex is a potential candidate for fission of the INM. ESCRT-III proteins form spiral  
278 filaments and mediate the invagination and fission of intraluminal vesicles in late endosomes,  
279 and these proteins are also known to exist on the nucleoplasmic surface of the INM, where they  
280 cause NE deformation similar to that observed in nucleophagy (McCullough et al., 2018; Lee et  
281 al., 2012; Webster et al., 2014). During the nucleus-to-cytoplasm exit of some herpesviruses, the  
282 INM, in association with nucleocapsids, invaginates and causes fission depending on ESCRT-III  
283 to release nucleocapsid-containing vesicles into the perinuclear space (Arii et al., 2018; Lee et al.,  
284 2012). Similarly, ESCRT-III may contribute to initial deformation, protrusion, and fission of the  
285 INM during NDV formation in nucleophagy. The molecular mechanism of ONM fission also  
286 remains unclear, but is thought to involve membrane-deforming proteins such as dynamin-related  
287 proteins and reticulon-family proteins, which are reported to mediate organelle fission during  
288 selective autophagy of mitochondria and the ER, respectively (Mao et al., 2013; Khaminets et al.,  
289 2015; Mochida et al., 2020).

290           In this study, INM insertion of the APHs was found to be important for the NE retention  
291 of Atg39. However, continuity between the ONM and the ER membrane poses the further  
292 question of why the APHs of Atg39 associate with the INM in the NE, but not with the opposite  
293 membrane in the ER. The difference in thickness (the distance between the two opposing

294 membranes) might be one answer to this question, given that the ER is thicker than the NE in *S.*  
295 *cerevisiae* (West et al., 2011), which might prevent the APHs of Atg39 from reaching the opposite  
296 membrane in the ER. Atg39 that has been synthesized in the ER is diffused to the NE and anchored  
297 to the INM via the APHs or degraded in the ER due to unstable APHs without membrane insertion.  
298 It is also conceivable that Atg39 APHs disfavor the lumen-facing leaflet of the ER due to its  
299 flatness or negative curvature, especially with the tubular ER. The perinuclear space region of  
300 Atg39 may also contain a sequence interacting with an INM protein, which cooperates with the  
301 APHs in Atg39 anchoring to the INM.

302           Although nucleophagy is thought to be advantageous for cells in that it can serve as a  
303 powerful system for quality and quantity control of nuclear components, it must avoid degrading  
304 components such as chromosomes that are essential for cell viability. In this study, we showed  
305 that NE protrusions induced by overexpression of Atg39, as well as NDVs, do not contain histones  
306 and DNA. We speculate that NE protrusions are thin enough to block the entry of chromosomes  
307 into NDVs, guaranteeing the safety in degradation of the nucleus.

308           NDV formation during nucleophagy is associated with complicated membrane dynamics  
309 in the NE. This study focused on the APHs of Atg39, providing a deeper understanding of the  
310 underlying mechanism. However, unresolved issues remain, including how NE deformation and  
311 autophagosome formation cooperate as well as how membrane fission occurs to release NDVs  
312 from NE protrusions. Further analysis of Atg39 and identification of other proteins involved in  
313 nucleophagy will be important in addressing these issues.

314

315 **Materials and methods**

316 **Yeast strains and plasmids**

317 Yeast strains used in this study are listed in Table S1. Gene deletion and tagging were based on a  
318 standard PCR-based method (Janke et al., 2004). pRS303-derived plasmids were integrated into  
319 the genome at the *HIS3* locus after linearization using the restriction enzyme *NsiI* (Sikorski and  
320 Hieter, 1989; Janke et al., 2004). Plasmids used in this study are listed in Table S2. They were  
321 constructed by amplifying appropriate DNA fragments by PCR and assembling them using the  
322 Gibson Assembly method (New England Biolabs). pRS315-NOP1pro-GFP<sup>1-10</sup>-mCherry-PUS1  
323 and pRS315-NOP1pro-GFP<sup>1-10</sup>-mCherry-SCS2TM were generated using PCR products amplified  
324 from Addgene plasmids #86413 and #86419 and Addgene plasmids #86416 and #86419,  
325 respectively.

326

327 **Yeast cell growth conditions**

328 Yeast cells were grown at 30°C in YPD medium (1% yeast extract, 2% peptone, and 2% glucose)  
329 or SD+CA medium (0.17% yeast nitrogen base without amino acids and ammonium sulphate,  
330 0.5% ammonium sulfate, 0.5% casamino acids, and 2% glucose) appropriately supplemented with  
331 0.002% adenine, 0.002% uracil, and 0.002% tryptophan. For nucleophagy induction, cells were  
332 grown to mid-log phase and treated with 200 ng/mL rapamycin. For Atg39 overexpression, cells  
333 in which *ATG39* was put under the control of the *CUPI* promoter were grown in SD+CA medium  
334 containing 250 µM CuSO<sub>4</sub> overnight. In Fig. 3D, cells expressing mCherry-tagged wild-type  
335 Atg39 were grown in SD+CA medium containing 10 µM CuSO<sub>4</sub> overnight. To develop large lipid  
336 droplets (Fig. S1B), cells were grown in SO+CA medium (0.17% yeast nitrogen base without  
337 amino acids and ammonium sulphate, 0.5% ammonium sulfate, 0.12% oleate, 0.2% Tween 40,  
338 0.1% glucose, 1% casamino acids, 0.1% yeast extract, 0.002% adenine sulfate, 0.002%

339 tryptophan, and 0.002% uracil) for 9 h.

340

#### 341 **Cell lysate extraction and immunoblotting**

342 Frozen yeast cells were resuspended in 200 mM NaOH and left on ice for 5 min. After  
343 centrifugation at 3,000 *g* and removal of the supernatants, the cell pellets were resuspended in  
344 urea SDS sample buffer [100 mM MOPS-KOH (pH 6.8), 4% SDS, 100 mM dithiothreitol (DTT),  
345 and 8 M urea] and incubated at 65°C for 10 min. Proteins were resolved by SDS-PAGE,  
346 transferred to PVDF membranes, and incubated with primary antibodies against GFP (Clontech,  
347 632381), HA (Roche, 11867431001), mRFP (a gift from Dr. Toshiya Endo), and Kar2 (a gift from  
348 Dr. Toshiya Endo). After incubation with HRP-conjugated secondary antibodies, the blots were  
349 visualized using ImageQuant LAS 4000 (GE Healthcare).

350

#### 351 **Fluorescence microscopy**

352 Yeast cells were analyzed using two different fluorescence microscopy systems, as described  
353 previously (Mochida et al., 2020). The images in Fig. 1D, 5B, S1A, S3C, and S4 were acquired  
354 using an inverted microscope (IX81; Olympus) equipped with an electron-multiplying CCD  
355 camera (ImagEM C9100-13; Hamamatsu Photonics), a 150× objective lens (UAPON  
356 150XOTIRF, NA/1.45; Olympus), a Z drift compensator (IX3-ZDC2; Olympus), and appropriate  
357 lasers and filters. For time-lapse imaging, cells were grown in the glass-bottom dish and kept at  
358 30°C using a stage top incubator (TOKAI HIT). The images in Fig. S3C were deconvoluted by  
359 AutoQuant X3 software (Media Cybernetics). All other fluorescence microscopy images were  
360 acquired using a Delta Vision Elite microscope system (GE Healthcare) equipped with a scientific  
361 CMOS camera (pco.edge 5.5; PCO AG) and a 60× objective lens (PLAPON, NA/1.42; Olympus).  
362 Images acquired by a Delta Vision were deconvoluted using SoftWoRx software. All acquired

363 images were analyzed using Fiji software (Schindelin et al., 2012).

364

### 365 **Quantification of fluorescence microscopy images**

366 Atg39-mCherry puncta and mNG-Atg8 puncta were detected using the Find Maxima function of  
367 Fiji as described previously (Mochida et al., 2020). When the maxima of Atg39-mCherry puncta  
368 exists within 272 nm of those of GFP- or mNG-Atg8 puncta, they were classified as GFP/mNG-  
369 Atg8-positive. The number of the Atg39-mCherry-positive tubules extending from the NE was  
370 manually counted. The length of the NE tubules was measured using the segmented line selection  
371 tool of Fiji. In branched tubules, the length of the longest tubule was measured.

372

### 373 **Proteinase K protection assay**

374 Yeast cells grown to mid-log phase were washed with 100 mM Tris-HCl (pH 8.0) containing 10  
375 mM DTT and then converted to spheroplasts by incubation in 0.5×YPD containing 1 M sorbitol  
376 and 200 µg/mL zymolyase 100T (Nacalai Tesque) at 30°C for 30 min. Cells were washed with 20  
377 mM HEPES-KOH (pH 7.2) containing 1.2M sorbitol and incubated in 0.5×YPD containing 1 M  
378 sorbitol and 200 ng/mL rapamycin for 3 h. After centrifugation, pelleted cells were resuspended  
379 in HSE buffer (20 mM HEPES-KOH (pH 7.2), 1M sorbitol, and 1mM EDTA) containing 0.5 ×  
380 Complete protease inhibitor cocktail (PIC) (Roche) and were passed through a polycarbonate  
381 membrane filter with a 3-µm pore size (Merck Millipore). The supernatants (lysates) were  
382 obtained by removing cell debris by centrifugation then treated with 1% Triton X-100 and 100  
383 µg/mL proteinase K on ice for 30 min. Proteolysis was stopped by the addition of 10 mM  
384 phenylmethylsulfonyl fluoride (PMSF), and after trichloroacetic acid precipitation, the proteins  
385 were solubilized in urea SDS sample buffer and analyzed by immunoblotting.

386

387 **Protein purification**

388 BJ3505 cells overexpressing Atg39<sup>297-324</sup>-GFP-GST, Atg39<sup>297-324 9A</sup>-GFP-GST, or GFP-GST were  
389 grown to late-log phase and harvested. Frozen cells were resuspended in buffer A [50 mM Tris-  
390 HCl (pH 7.5), 500 mM NaCl, 1 mM EDTA, and 10% glycerol] containing 2 × PIC, 2 mM PMSF,  
391 and 1 mM DTT, disrupted using a Multi-beads Shocker (Yasui Kikai) and 0.5-mm YZB zirconia  
392 beads, and solubilized with 1% Triton X-100. The lysates were cleared by centrifugation at  
393 100,000 *g* at 4°C for 30 min and then mixed with Glutathione Sepharose 4B (GE Healthcare).  
394 The Sepharose beads were washed with buffer B [50 mM Tris-HCl (pH 8.0), 500 mM NaCl, 1  
395 mM EDTA, and 10% glycerol] containing 0.01% Triton X-100, and then the bound proteins were  
396 eluted with buffer B containing 0.01% Triton X-100 and 10 mM reduced glutathione.

397

398 **Liposome flotation assay**

399 Liposomes were prepared as follows. Lipids in chloroform were mixed (55:25:20:0.005 mole  
400 percent POPC:DOPE:bovine liver PI:Rhodamine-DOPE) and dried in a glass tube. The lipid film  
401 was hydrated with buffer C [20 mM HEPES-KOH (pH 7.2) and 150 mM NaCl] at a lipid  
402 concentration of 1 mM before the suspension was repeatedly frozen and thawed. To prepare larger  
403 liposomes, the liposome suspension was extruded through a polycarbonate membrane filter with  
404 a 200-nm pore size (Merck Millipore). Smaller liposomes were prepared by sonicating the  
405 liposome suspension. The size of the liposomes was measured using a Zetasizer Nano S (Malvern  
406 Instruments).

407 40 μL of the prepared liposomes was mixed with 5 μL of 250 nM protein solution and  
408 80 μL of buffer C, and incubated for 1 h at 30°C. 125 μL of 100% OptiPrep (Abbott Diagnostics  
409 Technologies AS) was added to the mixture, which was then overlaid with 450 μL of buffer C  
410 containing 40% OptiPrep and 200 μL of Optiprep-free buffer C. After centrifugation at 200,000

411 g at 4°C for 105 min, the top, middle, and bottom fractions (300 µL each) were collected, and  
412 GFP fluorescence in each fraction was measured using a Varioskan Flash (Thermo Scientific).

413

#### 414 **Electron microscopy**

415 Electron microscopy was performed by Tokai-EMA Inc. Yeast cells were sandwiched with copper  
416 disks, rapidly frozen at −175°C, and freeze-substituted with ethanol containing 2% glutaraldehyde  
417 and 0.5% tannic acid. After dehydration, the samples were embedded in Quetol-651 resin and  
418 ultra-thin sectioned for observation under a transmission electron microscopy (JEM-1400Plus;  
419 JEOL). For immunoelectron microscopy, the samples were prepared in a similar manner, except  
420 that cells were freeze-substituted with ethanol containing 1% tannic acid and 2% water and  
421 embedded in LR white resin. The sections were incubated with an antibody against HA  
422 (11867431001, Roche) and then with a secondary antibody-conjugated to 10-nm gold particles.

423

#### 424 **Acknowledgements**

425 We thank the members of our laboratory for materials, discussions, and technical and secretarial  
426 support; and the Biomaterials Analysis Division of the Open Facility Center at the Tokyo Institute  
427 of Technology for DNA sequencing. This work was supported in part by KAKENHI Grants-in-  
428 Aid for Scientific Research JP17H01430 and JP19H05708 (to H.N.) from the Ministry of  
429 Education, Culture, Sports, Science, and Technology of Japan; AMED Grant Number  
430 JP21gm1410004 (to H.N.); STAR Grant funded by the Tokyo Tech Fund (to H.N.).

431 The authors declare no competing financial interests.

432 Author contributions: K. Mochida, T. Kotani, and H. Nakatogawa designed the project. K.  
433 Mochida, T. Otani, and Y. Katsumata performed the experiments with the help of H. Kirisako and  
434 C. Kakuta. K. Mochida and H. Nakatogawa wrote the manuscript. All authors analyzed and

435 discussed the results and commented on the manuscript.

436



437 **References**

- 438 Arai, J., M. Watanabe, F. Maeda, N. Tokai-Nishizumi, T. Chihara, M. Miura, Y. Maruzuru, N.  
439 Koyanagi, A. Kato, and Y. Kawaguchi. 2018. ESCRT-III mediates budding across the  
440 inner nuclear membrane and regulates its integrity. *Nat. Commun.* 9. doi:10.1038/s41467-  
441 018-05889-9.
- 442 Baumgart, T., B.R. Capraro, C. Zhu, and S.L. Das. 2011. Thermodynamics and mechanics of  
443 membrane curvature generation and sensing by proteins and lipids. *Annu. Rev. Phys.*  
444 *Chem.* 62:483–506. doi:10.1146/annurev.physchem.012809.103450.
- 445 Breker, M., M. Gymrek, O. Moldavski, and M. Schuldiner. 2014. LoQAtE—Localization and  
446 Quantitation ATlas of the yeast proteomE. A new tool for multiparametric dissection of  
447 single-protein behavior in response to biological perturbations in yeast. *Nucleic Acids Res.*  
448 42:D726–D730. doi:10.1093/nar/gkt933.
- 449 Dou, Z., C. Xu, G. Donahue, T. Shimi, J.-A. Pan, J. Zhu, A. Ivanov, B.C. Capell, A.M. Drake,  
450 P.P. Shah, J.M. Catanzaro, M. Daniel Ricketts, T. Lamark, S.A. Adam, R. Marmorstein,  
451 W.-X. Zong, T. Johansen, R.D. Goldman, P.D. Adams, and S.L. Berger. 2015. Autophagy  
452 mediates degradation of nuclear lamina. *Nature.* 527:105–109. doi:10.1038/nature15548.
- 453 Drin, G., and B. Antony. 2010. Amphipathic helices and membrane curvature. *FEBS Lett.*  
454 584:1840–1847. doi:10.1016/j.febslet.2009.10.022.
- 455 Enam, C., Y. Geffen, T. Ravid, and R.G. Gardner. 2018. Protein Quality Control Degradation in  
456 the Nucleus. *Annu. Rev. Biochem.* 87:725–749. doi:10.1146/annurev-biochem-062917-  
457 012730.
- 458 Farré, J.-C., and S. Subramani. 2016. Mechanistic insights into selective autophagy pathways:  
459 lessons from yeast. *Nat. Rev. Mol. Cell Biol.* 17:537–52. doi:10.1038/nrm.2016.74.
- 460 Janke, C., M.M. Magiera, N. Rathfelder, C. Taxis, S. Reber, H. Maekawa, A. Moreno-Borchart,

- 461 G. Doenges, E. Schwob, E. Schiebel, and M. Knop. 2004. A versatile toolbox for PCR-  
462 based tagging of yeast genes: New fluorescent proteins, more markers and promoter  
463 substitution cassettes. *Yeast*. doi:10.1002/yea.1142.
- 464 Khaminets, A., T. Heinrich, M. Mari, P. Grumati, A.K. Huebner, M. Akutsu, L. Liebmann, A.  
465 Stolz, S. Nietzsche, N. Koch, M. Mauthe, I. Katona, B. Qualmann, J. Weis, F. Reggiori, I.  
466 Kurth, C.A. Hübner, and I. Dikic. 2015. Regulation of endoplasmic reticulum turnover by  
467 selective autophagy. *Nature*. 522:354–358. doi:10.1038/nature14498.
- 468 Kirisako, T., M. Baba, N. Ishihara, K. Miyazawa, M. Ohsumi, T. Yoshimori, T. Noda, and Y.  
469 Ohsumi. 1999. Formation Process of Autophagosome Is Traced with Apg8 / Aut7p in  
470 Yeast. *Jcb*. 147:435–446. doi:10.1083/jcb.147.2.435.
- 471 Lee, C.P., P.T. Liu, H.N. Kung, M.T. Su, H.H. Chua, Y.H. Chang, C.W. Chang, C.H. Tsai, F.T.  
472 Liu, and M.R. Chen. 2012. The ESCRT Machinery Is Recruited by the Viral BFRF1  
473 Protein to the Nucleus-Associated Membrane for the Maturation of Epstein-Barr Virus.  
474 *PLoS Pathog*. 8. doi:10.1371/journal.ppat.1002904.
- 475 Lee, C.W., F. Wilfling, P. Ronchi, M. Allegretti, S. Mosalaganti, S. Jentsch, M. Beck, and B.  
476 Pfander. 2020. Selective autophagy degrades nuclear pore complexes. *Nat. Cell Biol*.  
477 doi:10.1038/s41556-019-0459-2.
- 478 Mao, K., K. Wang, X. Liu, and D.J. Klionsky. 2013. The scaffold protein Atg11 recruits fission  
479 machinery to drive selective mitochondria degradation by autophagy. *Dev. Cell*. 26:9–18.  
480 doi:10.1016/j.devcel.2013.05.024.
- 481 McCullough, J., A. Frost, and W.I. Sundquist. 2018. Structures, Functions, and Dynamics of  
482 ESCRT-III/Vps4 Membrane Remodeling and Fission Complexes. *Annu. Rev. Cell Dev.*  
483 *Biol*. 34:85–109. doi:10.1146/annurev-cellbio-100616-060600.
- 484 Mijaljica, D., and R.J. Devenish. 2013. Nucleophagy at a glance. *J. Cell Sci*. 126:4325–4330.

- 485           doi:10.1242/jcs.133090.
- 486   Mochida, K., Y. Oikawa, Y. Kimura, H. Kirisako, H. Hirano, Y. Ohsumi, and H. Nakatogawa.  
487           2015. Receptor-mediated selective autophagy degrades the endoplasmic reticulum and the  
488           nucleus. *Nature*. 522:359–362. doi:10.1038/nature14506.
- 489   Mochida, K., A. Yamasaki, K. Matoba, H. Kirisako, N.N. Noda, and H. Nakatogawa. 2020.  
490           Super-assembly of ER-phagy receptor Atg40 induces local ER remodeling at contacts with  
491           forming autophagosomal membranes. *Nat. Commun.* 11. doi:10.1038/s41467-020-17163-  
492           y.
- 493   Morishita, H., and N. Mizushima. 2019. Diverse Cellular Roles of Autophagy. *Annu. Rev. Cell*  
494           *Dev. Biol.* 35:453–475. doi:10.1146/annurev-cellbio-100818-125300.
- 495   Nakatogawa, H. 2020. Mechanisms governing autophagosome biogenesis. *Nat. Rev. Mol. Cell*  
496           *Biol.* doi:10.1038/s41580-020-0241-0.
- 497   Schindelin, J., I. Arganda-Carreras, E. Frise, V. Kaynig, M. Longair, T. Pietzsch, S. Preibisch,  
498           C. Rueden, S. Saalfeld, B. Schmid, J.Y. Tinevez, D.J. White, V. Hartenstein, K. Eliceiri, P.  
499           Tomancak, and A. Cardona. 2012. Fiji: An open-source platform for biological-image  
500           analysis. *Nat. Methods*. 9:676–682. doi:10.1038/nmeth.2019.
- 501   Sikorski, R.S., and P. Hieter. 1989. A system of shuttle vectors and yeast host strains designed  
502           for efficient manipulation of DNA in *Saccharomyces cerevisiae*. *Genetics*.  
503           doi:0378111995000377 [pii].
- 504   Smoyer, C.J., S.S. Katta, J.M. Gardner, L. Stoltz, S. McCroskey, W.D. Bradford, M. McClain,  
505           S.E. Smith, B.D. Slaughter, J.R. Unruh, and S.L. Jaspersen. 2016. Analysis of membrane  
506           proteins localizing to the inner nuclear envelope in living cells. *J. Cell Biol.* 215:575–590.  
507           doi:10.1083/jcb.201607043.
- 508   Stachowiak, J.C., E.M. Schmid, C.J. Ryan, H.S. Ann, D.Y. Sasaki, M.B. Sherman, P.L.

509 Geissler, D.A. Fletcher, and C.C. Hayden. 2012. Membrane bending by protein-protein  
510 crowding. *Nat. Cell Biol.* 14:944–9. doi:10.1038/ncb2561.

511 Tomioka, Y., T. Kotani, H. Kirisako, Y. Oikawa, Y. Kimura, H. Hirano, Y. Ohsumi, and H.  
512 Nakatogawa. 2020. TORC1 inactivation stimulates autophagy of nucleoporin and nuclear  
513 pore complexes. *J. Cell Biol.* 219. doi:10.1083/jcb.201910063.

514 Vevea, J.D., E.J. Garcia, R.B. Chan, G. Di Paolo, J.M. Mccaffery, L.A. Pon, J.D. Vevea, E.J.  
515 Garcia, R.B. Chan, B. Zhou, M. Schultz, G. Di Paolo, J.M. Mccaffery, and L.A. Pon.  
516 2015. Role for Lipid Droplet Biogenesis and Microlipophagy in Adaptation to Lipid  
517 Imbalance in Article Role for Lipid Droplet Biogenesis and Microlipophagy in Adaptation  
518 to Lipid Imbalance in Yeast. *Dev. Cell.* 35:584–599. doi:10.1016/j.devcel.2015.11.010.

519 Webster, B.M., P. Colombi, J. Jäger, and C. Patrick Lusk. 2014. Surveillance of nuclear pore  
520 complex assembly by ESCRT-III/Vps4. *Cell.* doi:10.1016/j.cell.2014.09.012.

521 West, M., N. Zurek, A. Hoenger, and G.K. Voeltz. 2011. A 3D analysis of yeast ER structure  
522 reveals how ER domains are organized by membrane curvature. *J. Cell Biol.* 193:333–346.  
523 doi:10.1083/jcb.201011039.

524 Woulfe, J. 2008. Nuclear bodies in neurodegenerative disease. *Biochim. Biophys. Acta.*  
525 1783:2195–206. doi:10.1016/j.bbamcr.2008.05.005.

526

527

528 **Figure Legends**

529 **Figure 1. Atg39 is a transmembrane protein embedded in the ONM.**

530 **(A, B)** Proteinase K protection assay was performed to determine the membrane topology of  
531 Atg39. Lysates were prepared from cells expressing HA-Atg39-GFP (A) or Atg39-GFP (B) and  
532 incubated with proteinase K (Prot. K) in the absence or presence of Triton X-100 (TX-100). N-  
533 terminal HA and C-terminal GFP tags were detected by immunoblotting using anti-HA and anti-  
534 GFP antibodies, respectively. Kar2, an ER luminal protein.

535 **(C)** Schematic diagram of Atg39. TM, transmembrane domain.

536 **(D)** Split GFP-based assay was carried out to determine the localization of Atg39. An N-terminal  
537 fragment of GFP (GFP<sup>1-10</sup>) and mCherry were fused to a transmembrane domain of Scs2 (GFP<sup>1-</sup>  
538 <sup>10</sup>-mCherry-Scs2) or Pus1 (GFP<sup>1-10</sup>-mCherry- Pus1), and the remaining C-terminal fragment of  
539 GFP (GFP<sup>11</sup>) was fused to the N-terminus of Atg39 or the C-terminus of the INM protein Heh1.  
540 Cells expressing these proteins were observed under a fluorescence microscope. Scale bars, 5  $\mu$ m.

541

542 **Figure 2. The APHs of Atg39 bind to the INM to retain Atg39 at the ONM.**

543 **(A)** Schematic diagram of the C-terminal perinuclear space region of Atg39. Helical wheels were  
544 generated using a HeliQuest server.

545 **(B)** mCherry-fused wild-type Atg39 (WT) and C-terminally truncated mutants were expressed  
546 under the constitutive *HRR25* promoter and analyzed by fluorescence microscopy. Tall, a  
547 nucleoplasmic protein.

548 **(C)** The localization of Atg39<sup>1-325</sup>-mCherry and Atg39<sup>1-325</sup> <sup>9A</sup>-mCherry was analyzed by  
549 fluorescence microscopy.

550 **(D)** Liposome flotation assay was carried out to examine the membrane-binding ability of APH<sup>297-</sup>  
551 <sup>325</sup>. Purified GFP-GST-fused proteins were mixed with small (~40 nm) or large (~160 nm)

552 liposomes, and then the liposomes and liposome-bound proteins were floated by  
553 ultracentrifugation. Data are shown as means  $\pm$  s.d. (n = 3).

554 **(E)** The determined membrane topology of Atg39.

555 Scale bars, 5  $\mu$ m.

556

557 **Figure 3. The APHs of Atg39 promote Atg39 assembly at the site of NDV formation.**

558 **(A)** Nucleophagy activity in *atg39 $\Delta$*  cells expressing wild-type (WT) Atg39 tagged with the HA  
559 sequence or C-terminally truncated mutants. Cells were treated with rapamycin to induce  
560 nucleophagy, and degradation of Tal1-GFP was examined by immunoblotting using an anti-GFP  
561 antibody. The quantification results are shown as means  $\pm$  s.d. (n = 3). \*\*\*\* $P$  < 0.0001; \*\* $P$  <  
562 0.01 (Student's *t*-test).

563 **(B)** Cells constitutively expressing Atg39-mCherry were treated with rapamycin and observed  
564 under a fluorescence microscope. The number of mNG-Atg8-positive and negative puncta of  
565 Atg39-mCherry (bottom left), and the fluorescence intensity of these puncta (bottom right) were  
566 measured and are shown graphically. Bars represent means  $\pm$  s.d. (n = 3) (bottom left). \*\*\*\* $P$  <  
567 0.001 (Student's *t*-test) (bottom left). \*\*\*\* $P$  < 0.001 (Mann–Whitney *U* test) (bottom right).

568 **(C, D)** Cells constitutively expressing Atg39-mCherry were treated with rapamycin for 0.5 h and  
569 analyzed by fluorescence microscopy. Fluorescence intensity along the dashed line in (C) was  
570 measured and is graphically shown. The bars represent means  $\pm$  s.d. (n = 3). \* $P$  < 0.05; \*\* $P$  <  
571 0.01; \*\*\* $P$  < 0.001 (Student's *t*-test).

572 Arrow heads, mNG/GFP-Atg8-positive Atg39-mCherry puncta. Arrows, mNG/GFP-Atg8-  
573 negative Atg39 puncta.

574 Scale bars, 5  $\mu$ m (B, D), 2  $\mu$ m (C).

575

576 **Figure 4. Atg39 accumulation in the NE causes NE tubulation dependent on the APHs.**

577 **(A)** *atg1Δ* cells expressing Atg39-mCherry under the *CUPI* promoter were grown in the presence  
578 or absence of 250 μM CuSO<sub>4</sub> overnight and treated with rapamycin for 2 h. The percentage of  
579 cells containing NE tubules (left) and length of NE tubules (right) are shown. Bars represent  
580 means ± s.d. (n=3). \**P* < 0.05; \*\*\*\**P* < 0.0001 (Tukey's multiple comparisons test) (left). \*\*\*\**P*  
581 < 0.0001 (Mann–Whitney *U* test) (right).

582 **(B)** *atg1Δ* cells overexpressing Atg39-mCherry in the presence of copper ions were treated with  
583 rapamycin for 2 h, and the nuclear morphology of these cells was examined by electron  
584 microscopy. LD, lipid droplet.

585 **(C)** mCherry-fused Atg39 and Atg39<sup>1-296</sup> were overexpressed in *atg1Δ* cells. These cells were  
586 treated with rapamycin for 2 h, and the formation of NE tubules was analyzed by fluorescence  
587 microscopy. Arrowheads, NE tubules. \*\*\*\**P* < 0.0001 (Tukey's multiple comparisons test).  
588 Scale bars, 5 μm (A, C), 200 nm (B).

589

590 **Figure 5. NE tubules and NDVs exclude chromosomes.**

591 **(A)** NE tubule formation was induced by overexpression of Atg39-mCherry in *atg1Δ* cells  
592 followed by treatment with rapamycin treatment for 2 h. The colocalization of Atg39-mCherry-  
593 positive NE tubules with GFP-fused Heh1, Tal1, Nop56, and Hta2 was examined by fluorescence  
594 microscopy. Arrowheads, NE tubules containing GFP signals. The percentage of NE tubules  
595 containing nuclear components is shown in the graph. Bars represent means ± s.d. (n =3).

596 **(B)** *ypt7Δ* cells overexpressing Atg39-mCherry were treated with rapamycin for 4 h. Arrowheads,  
597 puncta of Tal1-GFP that colocalized with those of Atg39-mCherry. Fluorescence intensity along  
598 the dashed line was measured, and the results are shown in the graph.

599 Scale bars, 5 μm

600

601 **Figure 6. Model mechanism of NDV formation in Atg39-mediated nucleophagy.**

602 Atg39 forms a small cluster depending on APHs in the NE region where the INM partially  
603 protrudes via an unknown mechanism. Then, Atg39 in the cluster recruits the core Atg proteins  
604 via Atg11 on the cytoplasmic surface of the NE, initiating autophagosome formation, which  
605 triggers the further assembly of Atg39, probably via interaction with Atg11 and Atg8 on the  
606 forming autophagosomal membrane. The condensation of Atg39 locally enhances its APH-  
607 dependent membrane-deforming activity, protruding the NE toward the cytoplasm at the site. An  
608 unknown mechanism mediates fission of the tip of the protrusion to release a NDV, which is  
609 sequestered into the autophagosome via the interaction between Atg39 and Atg8, a canonical  
610 function of autophagy receptors.

611



612 **Supplemental Figure Legends**

613 **Figure S1. The perinuclear space region of Atg39 associates with the INM.**

614 (A) The intracellular localization of mCherry-fused wild-type Atg39 (WT) and the N-terminally-  
615 truncated mutants expressed under the *HRR25* promoter was analyzed by fluorescence  
616 microscopy.

617 (B) Cells coexpressing Atg39<sup>167-398</sup>-GFP and the lipid droplet protein Osw5 labeled with mCherry  
618 were incubated in oleate-containing medium for 9 h to induce large lipid droplet formation and  
619 analyzed under a fluorescence microscope.

620 (C) The 4×HA sequence was inserted between the APH<sup>297-324</sup> and APH<sup>365-379</sup> of Atg39, and cells  
621 expressing this Atg39 variant were analyzed by immunoelectron microscopy using anti-HA  
622 antibody. Immunogold signals in the vicinity of the INM and ONM were counted and the results  
623 are shown in the graph.

624 Scale bars, 5  $\mu$ m (A, B), 200 nm (C).

625

626 **Figure S2. Atg39 assembly in different *atg* mutants.**

627 Cells constitutively expressing Atg39-mCherry under the *HRR25* promoter were treated with  
628 rapamycin for 0.5 h and analyzed by fluorescence microscopy. The number of Atg39-mCherry  
629 puncta per cell (top right) and the fluorescence intensity of Atg39-mCherry puncta (including both  
630 mNG-Atg8-positive and -negative puncta) (bottom right) are shown. Arrow heads, mNG-Atg8-  
631 positive Atg39 puncta. Arrows, mNG-Atg8-negative Atg39 puncta. Bars represent means  $\pm$  s.d.  
632 (n = 3). \*\*\* $P$  < 0.001 (Student's *t*-test) (top right). \*\*\*\* $P$  < 0.001 (Mann-Whitney *U* test) (bottom  
633 right). Scale bars, 5  $\mu$ m

634

635 **Figure S3. Analysis of NE tubules induced by Atg39 overexpression.**

636 (A) NE tubule formation was induced by Atg39 overexpression and 2 h rapamycin treatment in  
637 *atg1Δ* cells, and the effects of additional deletion of *ATG8* or *ATG11* on tubule formation was  
638 examined by fluorescence microscopy. The percentage of cells containing NE tubules (top right)  
639 and the length of NE tubules (bottom right) are shown. Bars represent means  $\pm$  s.d. ( $n = 3$ ).  
640 Statistical significance was determined using Tukey's multiple comparisons test (top right) and  
641 the Kruskal-Wallis test (bottom right), respectively. Arrowheads, NE tubules with GFP signals.  
642 (B) Cells expressing Atg39-mCherry under the own promoter at the original chromosomal locus  
643 were treated with rapamycin for 4 h, and Atg39-mCherry puncta formed at the NE protrusion tip  
644 were analyzed by fluorescence microscopy. Fluorescence intensity along the dashed line was  
645 measured and is shown graphically. Arrowhead, NE protrusion.  
646 (C) Cells expressing Atg39-mCherry under the *CUPI* promoter were treated with rapamycin for  
647 20 min and then fluorescence images were taken at 15-s intervals. Arrowheads, GFP-Atg8-  
648 positive Atg39-mCherry puncta at the tip of NE tubules. Arrow, NDV.  
649 (D) A representative EM image of a NE tubule without the INM (arrowhead) generated in *atg1Δ*  
650 cells overexpressing Atg39 and treated with rapamycin treatment for 2 h.  
651 Scale bars, 5  $\mu$ m (A, B), 2  $\mu$ m (C), 200 nm (D)

652

653 **Figure S4. NDVs do not contain DNA.**

654 *ypt7Δ* cells overexpressing Atg39-mCherry were treated with rapamycin for 8 h, and the DNA  
655 was stained with Hoechst 33258. Arrowheads, nuclei. Small puncta marked by asterisks and that  
656 did not colocalize with Atg39-mCherry puncta represent mitochondrial DNA. Fluorescence  
657 intensity along the dashed line was measured and is shown in the graph. Scale bars, 5  $\mu$ m.

658

**Table S1. Yeast strains used in this study**

| Name    | Genotype                                                                                                      |
|---------|---------------------------------------------------------------------------------------------------------------|
| YKM976  | BJ3505 <i>natNT2-ADHpro-3HA-ATG39-EGFP-hphNT1 atg1Δ::zeoNT3</i>                                               |
| YKM977  | BJ3505 <i>natNT2-ADHpro-ATG39-EGFP-hphNT1 atg1Δ::zeoNT3</i>                                                   |
| YKM1932 | BY4741 <i>natNT2-HRR25pro-GFP<sup>11</sup>-ATG39</i>                                                          |
| YKM1932 | BY4741 <i>natNT2-HRR25pro-GFP<sup>11</sup>-ATG39</i>                                                          |
| YKM1938 | BY4741 <i>HEH1-GFP<sup>11</sup>-natNT2</i>                                                                    |
| YKM1536 | BY4741 <i>TAL1-EGFP-kanMX6 atg39Δ::natNT2</i>                                                                 |
| YKM1998 | BY4741 <i>natNT2-HRR25pro-ATG39-mCherry-hphNT1 his3::mNeonGreen-ATG8-kanMX4</i>                               |
| YKM1094 | BY4741 <i>natNT2-CUP1pro-ATG39-mCherry-hphNT1 his3::GFP-ATG8<sup>G116</sup>-zeoNT3</i>                        |
| YKY156  | BY4741 <i>natNT2-CUP1pro-ATG39<sup>1-296</sup>-mCherry-kanMX6 his3::GFP-ATG8<sup>G116</sup>-zeoNT3</i>        |
| YKM1329 | BY4741 <i>natNT2-CUP1pro-ATG39-mCherry-hphNT1 HEH1-EGFP-kanMX4 atg1Δ::zeoNT3</i>                              |
| YOT61   | BY4741 <i>atg39Δ::natNT2 atg1Δ::zeoNT3 his3::pRS303-CUP1pro-ATG39-mCherry</i>                                 |
| YOT62   | BY4741 <i>atg39Δ::natNT2 atg1Δ::zeoNT3 his3::pRS303-CUP1pro-ATG39<sup>1-296</sup>-mCherry</i>                 |
| YOT37   | BY4741 <i>natNT2-CUP1pro-ATG39-mCherry-hphNT1 TAL1-EGFP-zeoNT3 atg1Δ::URA3</i>                                |
| YOT38   | BY4741 <i>natNT2-CUP1pro-ATG39-mCherry-hphNT1 NOP56-EGFP-zeoNT3 atg1Δ::URA3</i>                               |
| YOT22   | BY4741 <i>natNT2-CUP1pro-ATG39-mCherry-hphNT1 HTA2-EGFP-kanMX6 atg1Δ::URA3</i>                                |
| YKM1512 | BY4741 <i>natNT2-CUP1pro-ATG39-mCherry-hphNT1 TAL1-EGFP-kanMX6 ypt7Δ::zeoNT3</i>                              |
| YKM1506 | BY4741 <i>natNT2-CUP1pro-ATG39-mCherry-hphNT1 HTA2-EGFP-kanMX6 ypt7Δ::zeoNT3</i>                              |
| YKM1515 | BY4741 <i>natNT2-CUP1pro-ATG39-mCherry-hphNT1 HTZ1-EGFP-kanMX6 ypt7Δ::zeoNT3</i>                              |
| YKM1809 | BY4741 <i>natNT2-HRR25pro-ATG39-EGFP-kanMX6 PUS1-mCherry-hphNT1</i>                                           |
| YKM1813 | BY4741 <i>natNT2-HRR25pro-ATG39<sup>136-398</sup>-EGFP-kanMX6 PUS1-mCherry-hphNT1</i>                         |
| YKM1814 | BY4741 <i>natNT2-HRR25pro-ATG39<sup>167-398</sup>-EGFP-kanMX6 PUS1-mCherry-hphNT1</i>                         |
| YKM1857 | BY4741 <i>natNT2-HRR25pro-ATG39<sup>167-398</sup>-EGFP-kanMX6 OSW5-mCherry-hphNT1</i>                         |
| YKM2040 | BY4741 <i>natNT2-HRR25pro-ATG39-mCherry-hphNT1 his3::mNeonGreen-ATG8-kanMX4 atg1Δ::zeoNT3</i>                 |
| YKM2041 | BY4741 <i>natNT2-HRR25pro-ATG39-mCherry-hphNT1 his3::mNeonGreen-ATG8-kanMX4 atg2Δ::zeoNT3</i>                 |
| YKM2036 | BY4741 <i>natNT2-HRR25pro-ATG39-mCherry-hphNT1 his3::mNeonGreen-ATG8-kanMX4 atg11Δ::zeoNT3</i>                |
| YKM2043 | BY4741 <i>natNT2-HRR25pro-ATG39-mCherry-hphNT1 his3::mNeonGreen-ATG8-kanMX4 atg11Δ::zeoNT3 atg17Δ::CgHIS3</i> |
| YOT43   | BY4741 <i>natNT2-CUP1pro-ATG39-mCherry-hphNT1 HEH1-EGFP-kanMX4 atg1Δ::URA3 atg8Δ::zeoNT3</i>                  |
| YOT44   | BY4741 <i>natNT2-CUP1pro-ATG39-mCherry-hphNT1 HEH1-EGFP-kanMX4 atg1Δ::URA3 atg11Δ::zeoNT3</i>                 |
| YKM1990 | BY4741 <i>ATG39-mCherry-hphNT his3::pRS303-HRR25pro-mTurquoise2-HEH1<sup>163-480</sup></i>                    |
| YKM1138 | BY4741 <i>natNT2-CUP1pro-ATG39-mCherry-hphNT1 ypt7Δ::zeoNT3</i>                                               |

**Table S2. Plasmids used in this study**

| Name   | Description                                                                                                                                |
|--------|--------------------------------------------------------------------------------------------------------------------------------------------|
| pKE453 | pRS315- <i>NOPI</i> pro- <i>GFP</i> <sup>1-10</sup> - <i>mCherry</i> - <i>PUS1</i>                                                         |
| pKE454 | pRS315- <i>NOPI</i> pro- <i>GFP</i> <sup>1-10</sup> - <i>mCherry</i> - <i>SCS2TM</i>                                                       |
| pKE386 | pRS316- <i>HRR25</i> pro- <i>ATG39</i> -2× <i>mCherry</i>                                                                                  |
| pKE394 | pRS316- <i>HRR25</i> pro- <i>ATG39</i> <sup>1-347</sup> -2× <i>mCherry</i>                                                                 |
| pKE465 | pRS316- <i>HRR25</i> pro- <i>ATG39</i> <sup>1-325</sup> -2× <i>mCherry</i>                                                                 |
| pKE396 | pRS316- <i>HRR25</i> pro- <i>ATG39</i> <sup>1-296</sup> -2× <i>mCherry</i>                                                                 |
| pKE398 | pRS316- <i>HRR25</i> pro- <i>ATG39</i> <sup>1-194</sup> -2× <i>mCherry</i>                                                                 |
| pKE474 | pRS316- <i>HRR25</i> pro- <i>ATG39</i> <sup>1-325 9A</sup> -2× <i>mCherry</i>                                                              |
| pKE319 | pRS316- <i>ATG39</i> -6 <i>HA</i>                                                                                                          |
| pKE475 | pRS316- <i>ATG39</i> <sup>1-347</sup> -6 <i>HA</i>                                                                                         |
| pKE471 | pRS316- <i>ATG39</i> <sup>1-325</sup> -6 <i>HA</i>                                                                                         |
| pKE480 | pRS316- <i>ATG39</i> <sup>1-296</sup> -6 <i>HA</i>                                                                                         |
| pKE481 | pRS316- <i>ATG39</i> <sup>1-194</sup> -6 <i>HA</i>                                                                                         |
| pKE487 | pRS316- <i>HRR25</i> pro- <i>mTurquoise2</i> - <i>HEH1</i> <sup>1-480</sup>                                                                |
| pKE497 | pRS316- <i>HRR25</i> pro-6 <i>FLAG</i> - <i>ATG39</i> <sup>136-347</sup> -4 <i>HA</i> - <i>ATG39</i> <sup>348-398</sup> -2× <i>mCherry</i> |

**Figure 1**

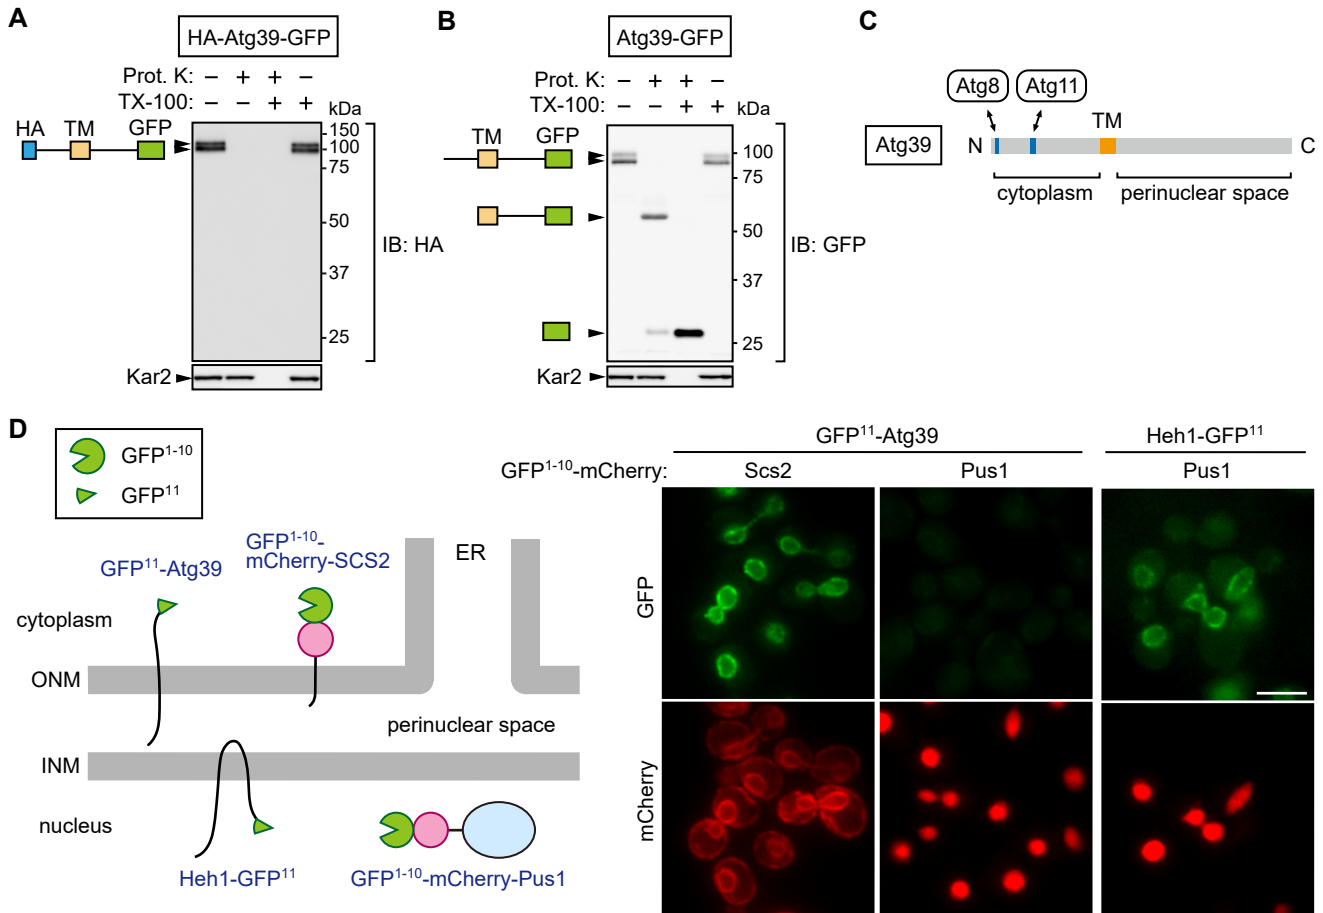

**Figure 2**

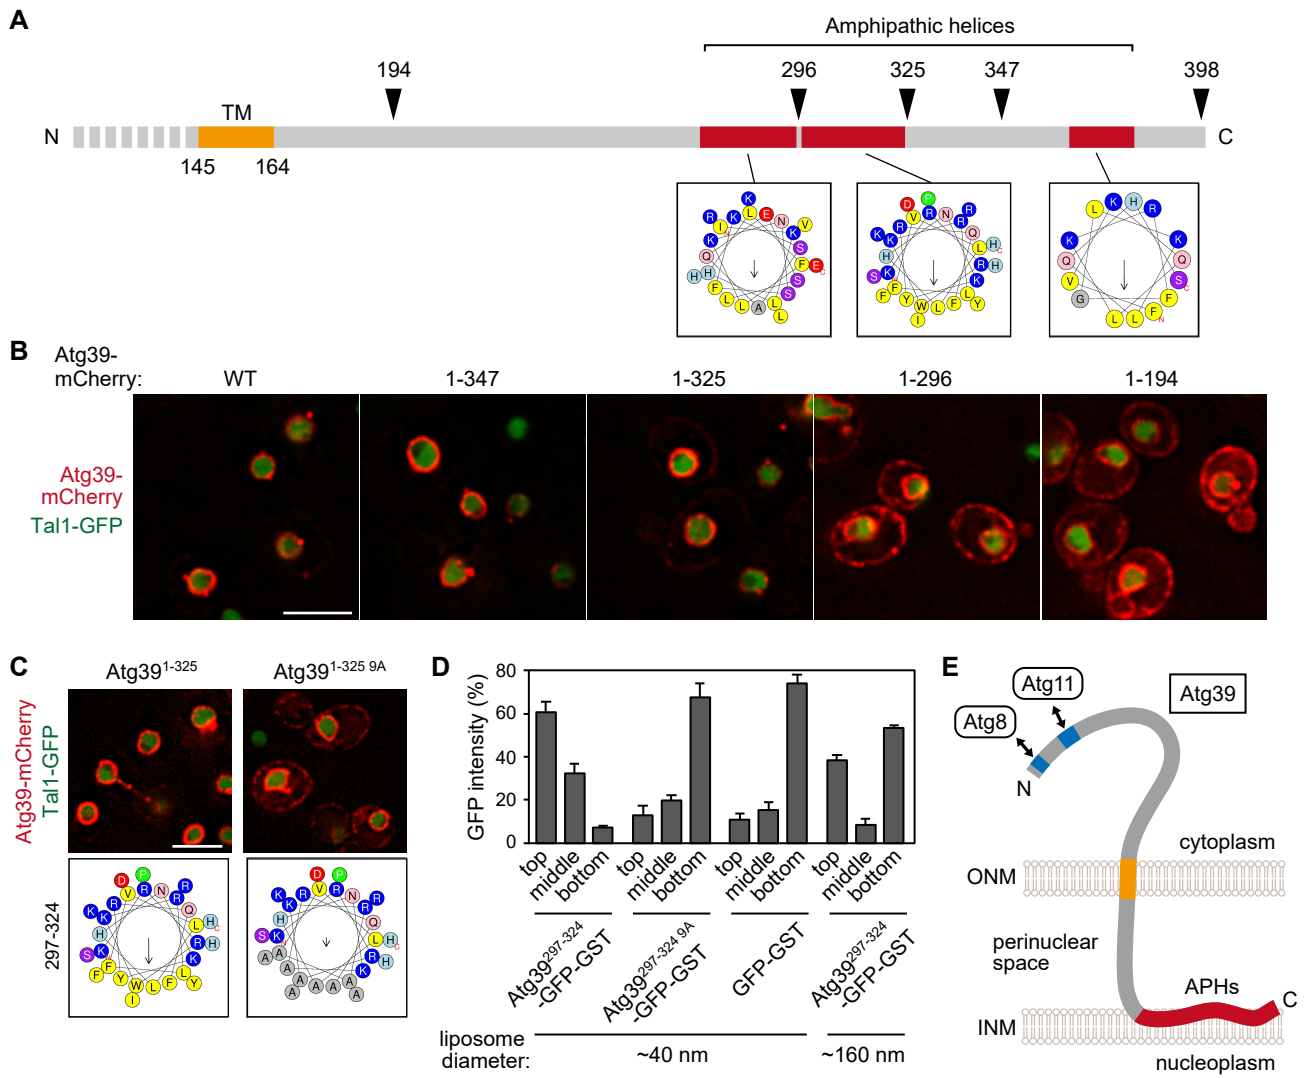

**Figure 3**

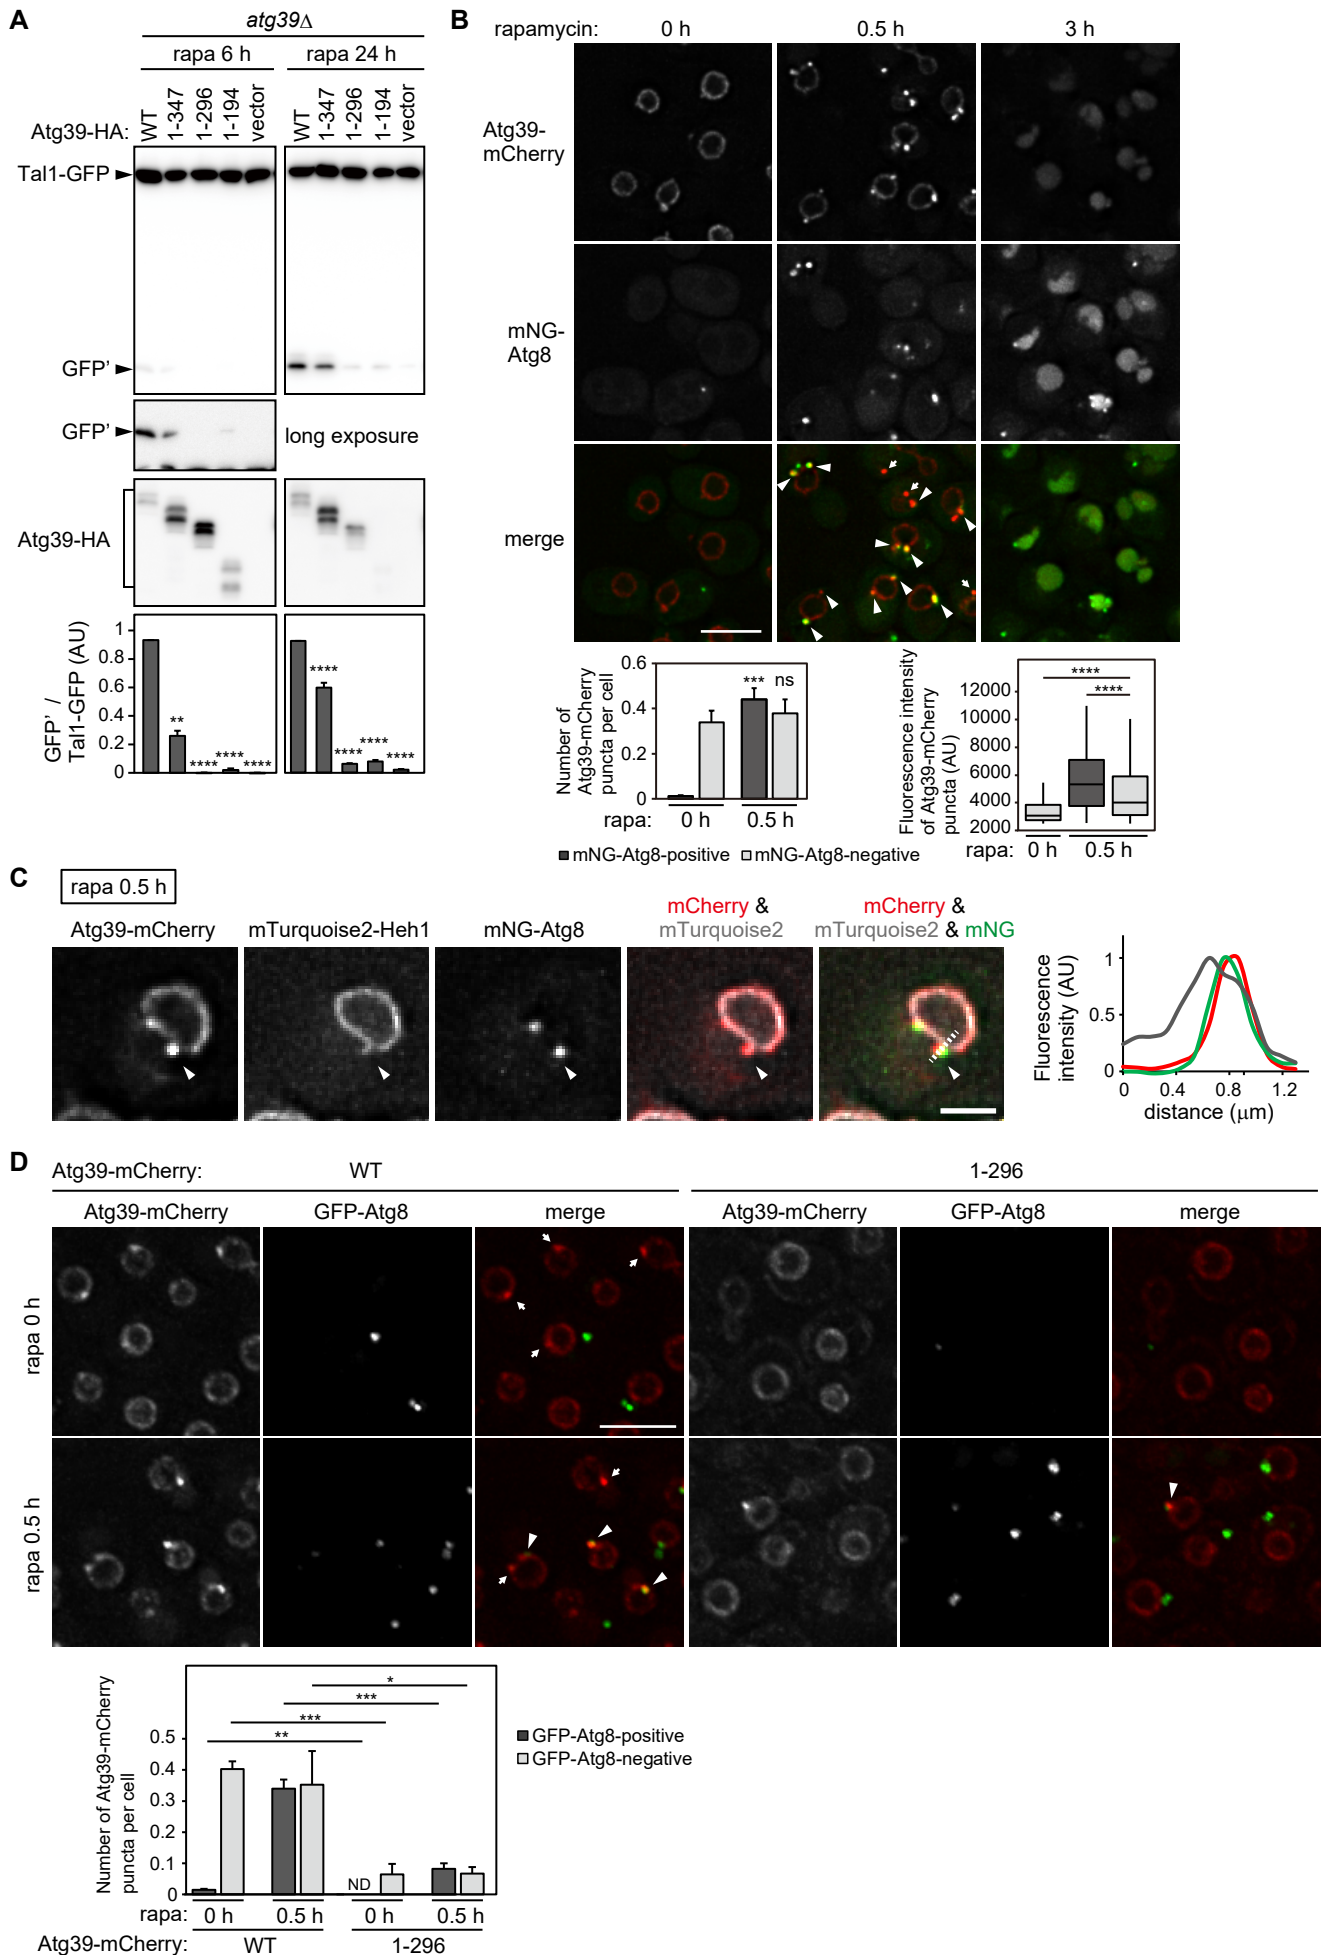



**Figure 4**

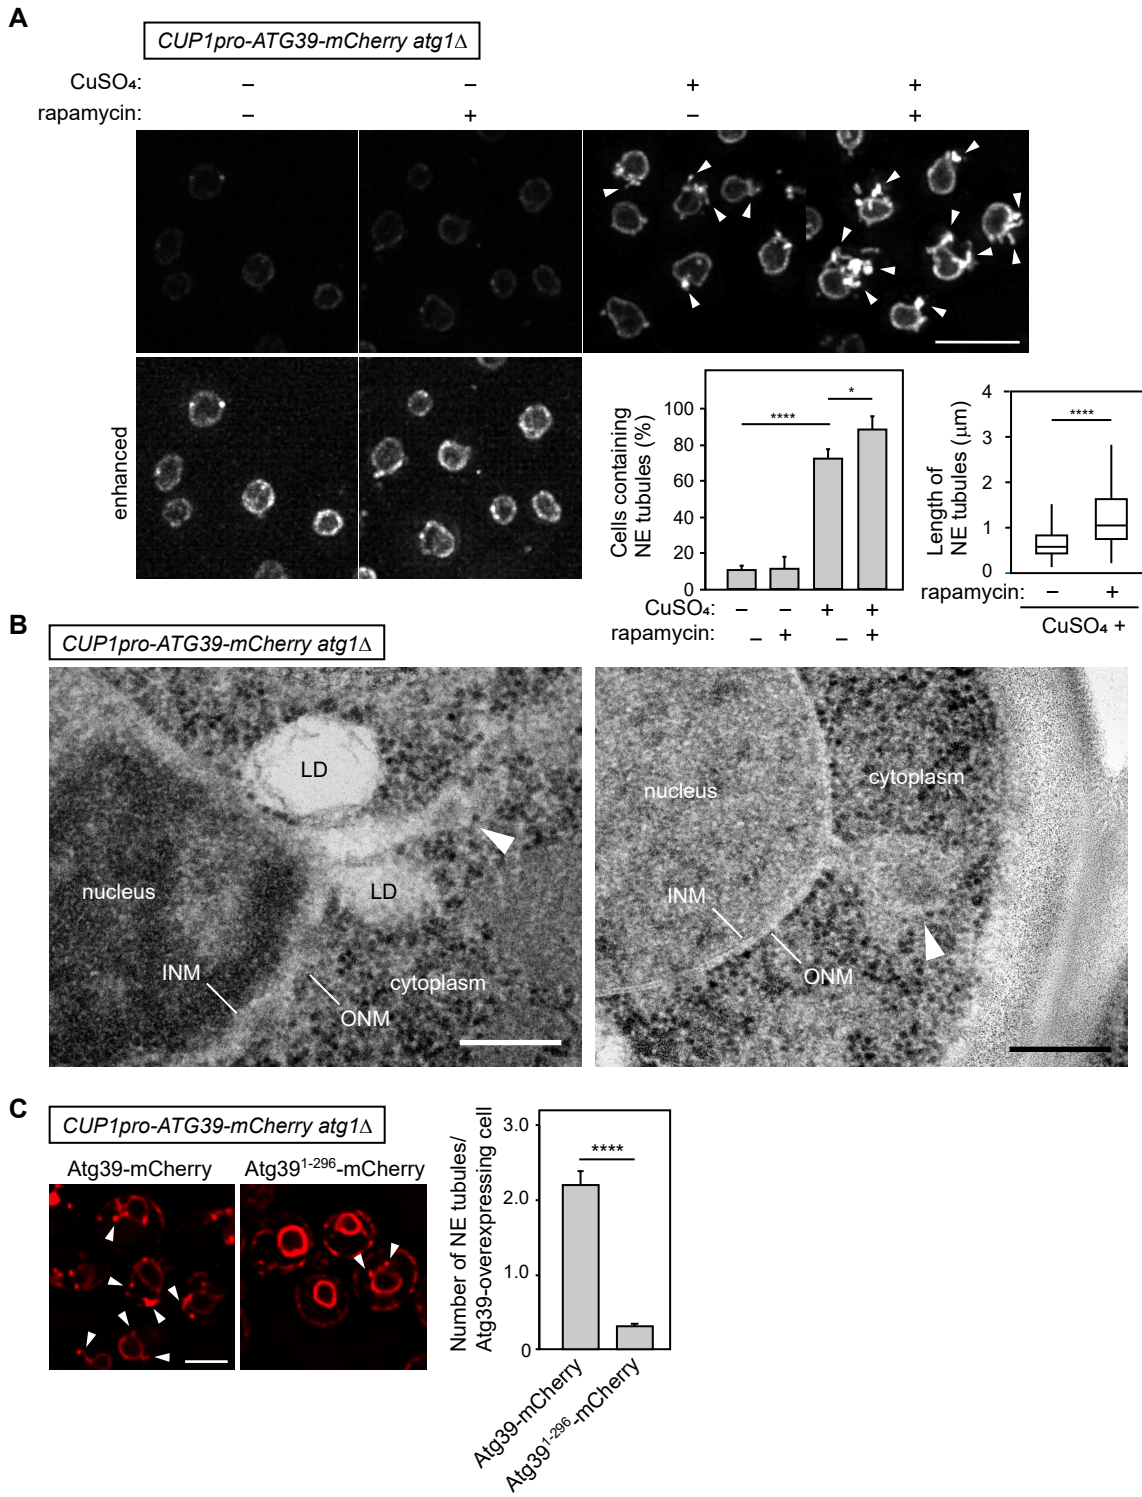



**Figure 5**

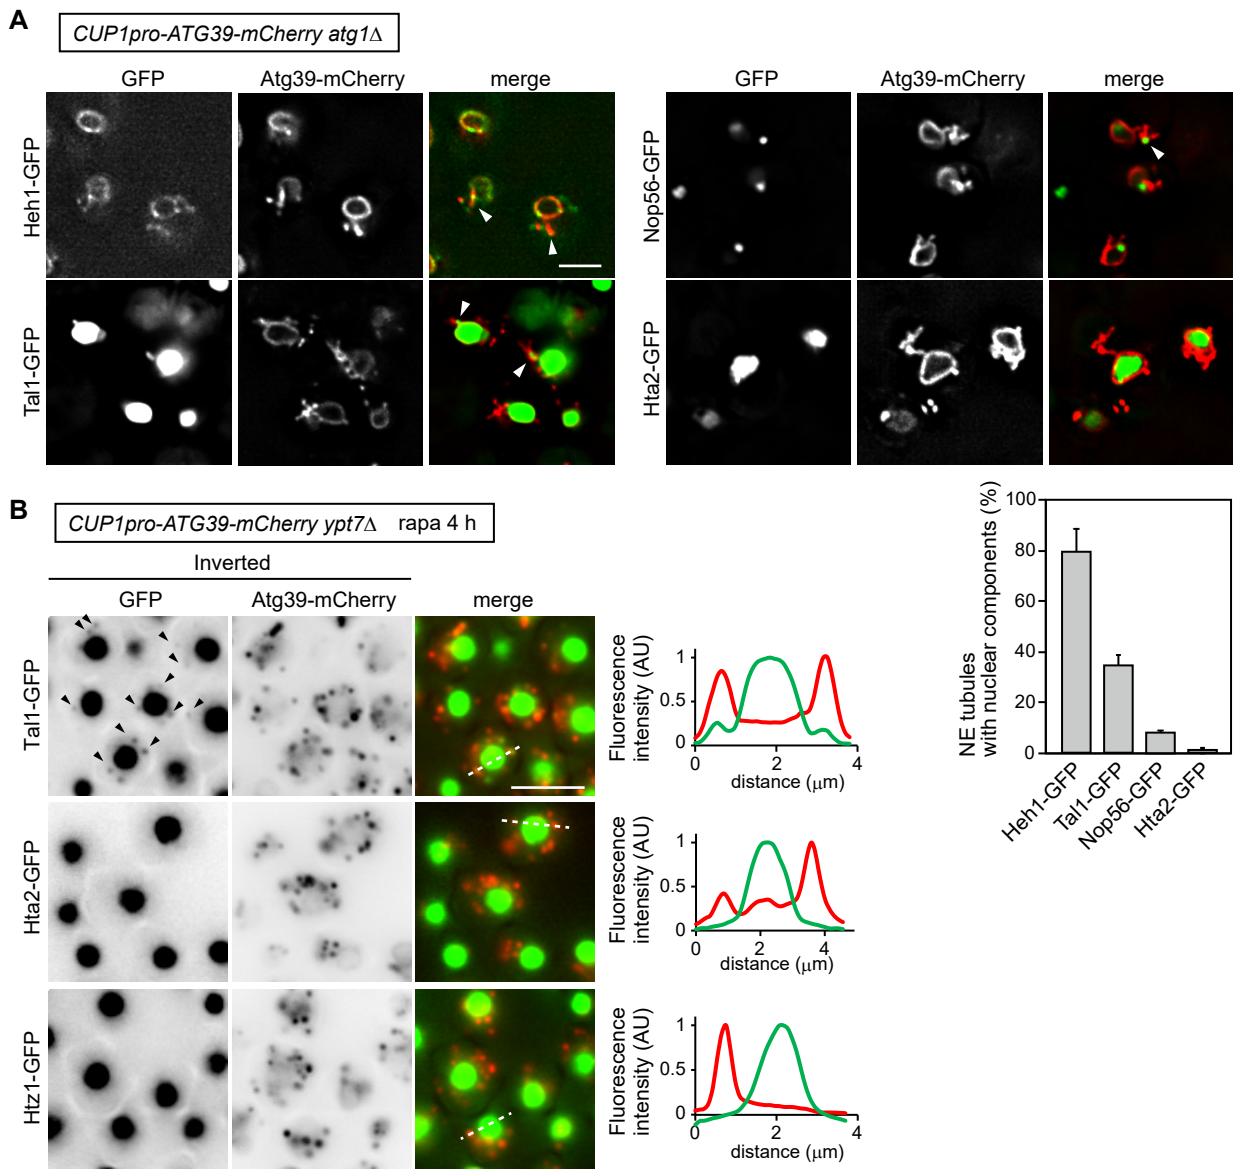

**Figure 6**

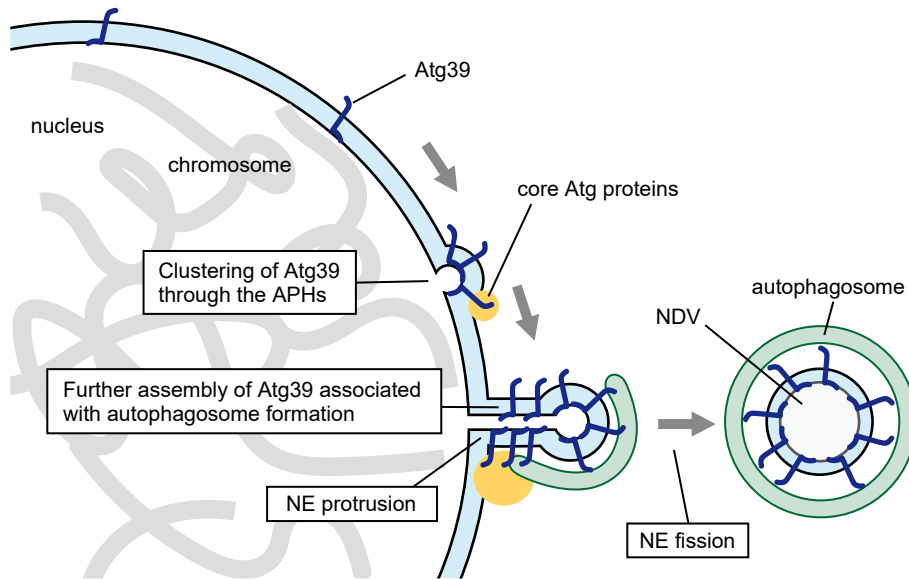

## Figure S1

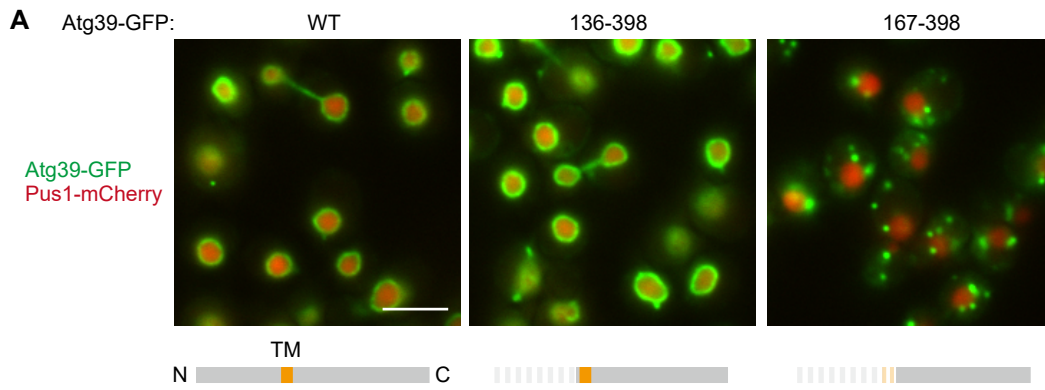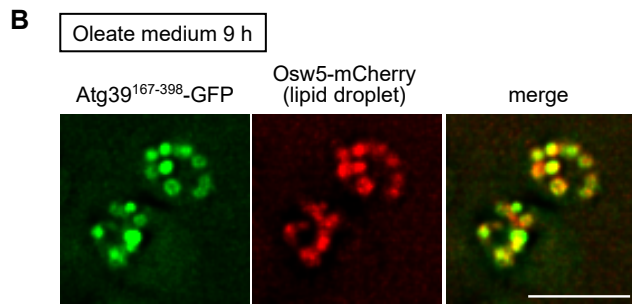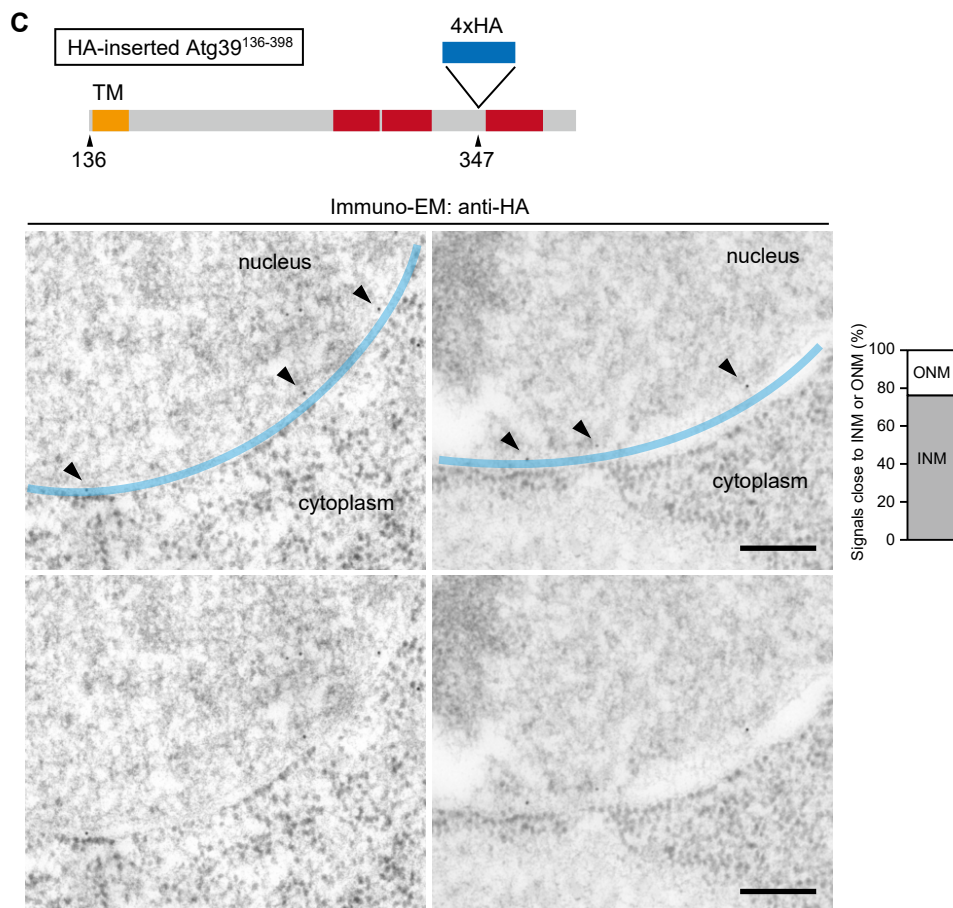

**Figure S2**

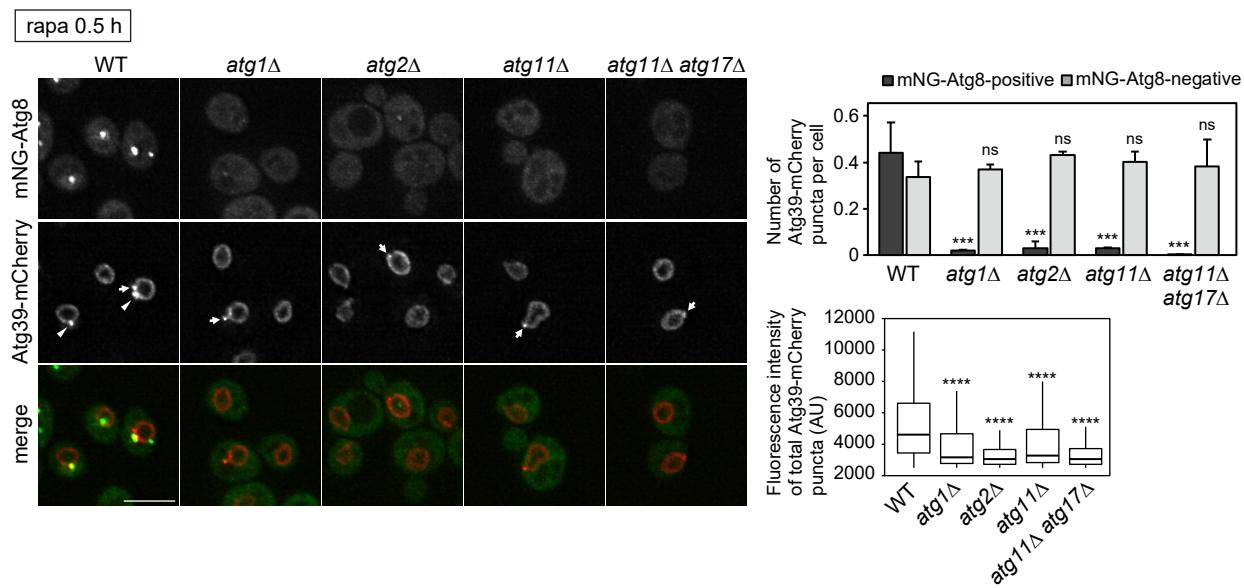

**Figure S3**

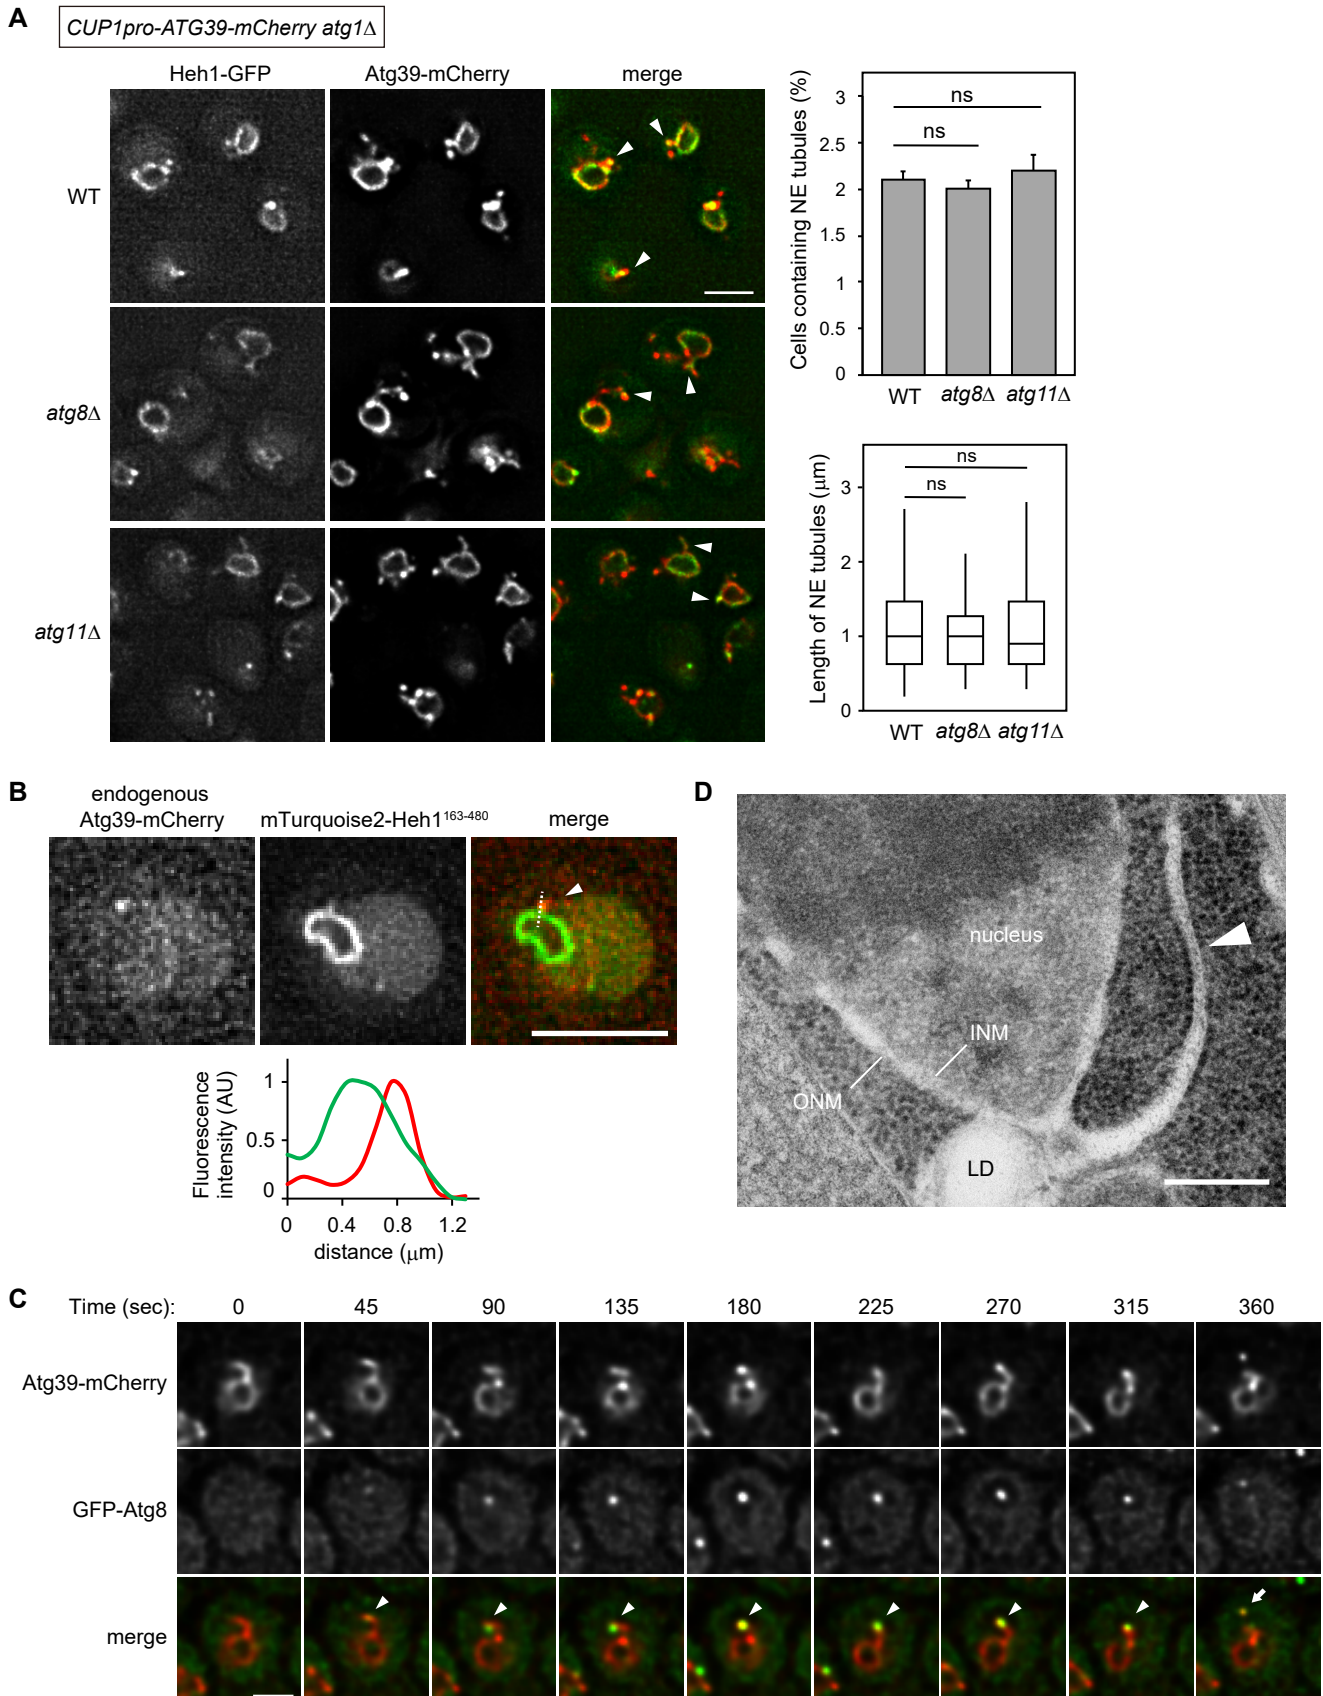



**Figure S4**

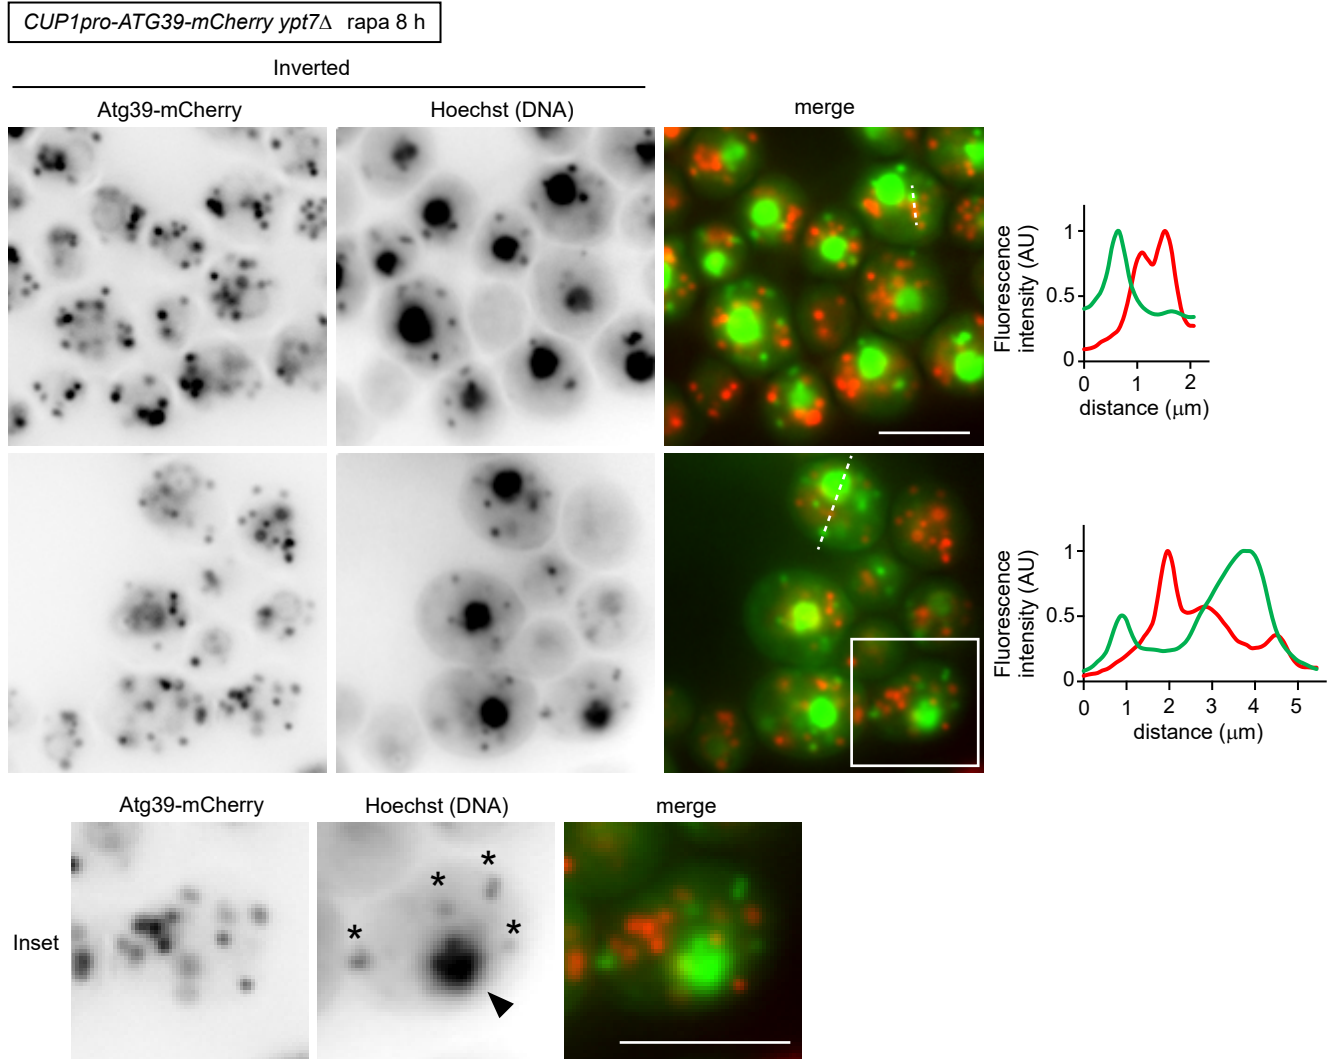

Source: https://biorxiv.org/content/10.1101/2021.03.29.437603v1.full.pdf
